1

## Title Page

2

**Full title** Adult porcine (*Sus scrofa*) derived inner ear cells possessing multipotent stem/progenitor cell characteristics in *in vitro* cultures

**Short title** Adult porcine derived inner ear *in vitro* cell culture

**Authors& Affiliations** 1) Printha Wijesinghe

<sup>1</sup>Division of Otolaryngology, Department of Surgery, University of British Columbia, Vancouver, British Columbia, Canada

<sup>2</sup>Vancouver Coastal Health Research Institute, Vancouver, British Columbia, Canada

Email: printha.wijesinghe@ubc.ca

2) Anand Sastry

<sup>1</sup> Consultant Interventional Neuroradiologist, University Hospital of Wales, United Kingdom

Email: Anand.Sastry@wales.nhs.uk

3) Elizabeth Hui

<sup>1</sup>Division of Otolaryngology, Department of Surgery, University of British Columbia, Vancouver, British Columbia, Canada

<sup>2</sup>Vancouver Coastal Health Research Institute, Vancouver, British Columbia, Canada

Email: ehui@cmmt.ubc.ca

4) Tristan A. Cogan

<sup>1</sup>Bristol Veterinary School, University of Bristol, Langford House, Langford, Bristol, United Kingdom

Email: [tristan.cogan@bristol.ac.uk](mailto:tristan.cogan@bristol.ac.uk)

5) Boyuan Zheng

<sup>1</sup>Division of Otolaryngology, Department of Surgery, University of British Columbia, Vancouver, British Columbia, Canada

<sup>2</sup>Vancouver Coastal Health Research Institute, Vancouver, British Columbia, Canada

Email: [boyuanzheng94@gmail.com](mailto:boyuanzheng94@gmail.com)

6) Germain Ho

<sup>1</sup>Division of Otolaryngology, Department of Surgery, University of British Columbia, Vancouver, British Columbia, Canada

<sup>2</sup>Vancouver Coastal Health Research Institute, Vancouver, British Columbia, Canada

Email: [germain.ho@hotmail.com](mailto:germain.ho@hotmail.com)

7) Juzer Kakal

<sup>1</sup>Division of Otolaryngology, Department of Surgery, University of British Columbia, Vancouver, British Columbia, Canada

<sup>2</sup>Vancouver Coastal Health Research Institute, Vancouver, British Columbia, Canada

Email: [jk.consulting.canada+pubs@gmail.com](mailto:jk.consulting.canada+pubs@gmail.com)

8) Desmond A. Nunez

<sup>1</sup>Division of Otolaryngology, Department of Surgery, University of British Columbia, Vancouver, British Columbia, Canada

<sup>2</sup>Vancouver Coastal Health Research Institute, Vancouver, British Columbia, Canada

<sup>3</sup>Division of Otolaryngology, Head & Neck Surgery, Gordon &

Leslie Diamond Health Care Centre, Vancouver General

Hospital, Vancouver, British Columbia, Canada

Email: [desmond.nunez@ubc.ca](mailto:desmond.nunez@ubc.ca)

**Corresponding Author**

Desmond A Nunez MD MBA FRCS(ORL) FRCSC

Associate Professor, Head- Division of Otolaryngology,

Department of Surgery,

The University of British Columbia, Diamond Health Care

Centre

4th Floor-2775 Laurel Street, Vancouver, BC Canada V5Z 1M9

Email: [desmond.nunez@ubc.ca](mailto:desmond.nunez@ubc.ca)

Phone: 604 875 4664

Fax: 604 875 5018

ORCID ID: 0000-0002-7501-9625

3  
4  
5  
6  
7  
8  
9  
10  
11  
12

13 **Abstract**

14 The human inner ear compared with that of other mammalian species is very complex.  
15 Although the mouse's cochlea is frequently studied the mouse's inner ear continues to  
16 develop postnatally whilst the human inner ear is fully developed by the third month of  
17 gestation which leads one to question the applicability of findings based on research on mice  
18 to human regenerative therapies. Here, we report a novel *in vitro* culture of adult porcine (*Sus*  
19 *scrofa*) inner ear cells developed from post-mortem labyrinth specimens. Anatomical findings  
20 based on maximal transverse and vertical axial diameters and the length of the cochlear duct  
21 suggest that the pig's cochlea is similar to the human cochlea. *In vitro* cultures of porcine  
22 cochlear and vestibular cells showed the persistence of both inner ear hair cell (HC),  
23 supporting cell (SC) and stem/progenitor cell characteristics across passages up to 6 based on  
24 scanning electron microscopy, fluorescence immunocytochemistry and quantitative reverse  
25 transcription polymerase chain reaction (RT-qPCR). Our findings showed that porcine  
26 cochlear and vestibular epithelia maintained multipotent stem/progenitor cell populations into  
27 adulthood although their regenerative capacities differed across the passages. The  
28 development of a viable and reproducible method to culture porcine inner ear cells provides  
29 an important investigative tool that can be utilized to study and evaluate the  
30 pathophysiological causes and cellular consequences of human inner ear disorders.

31

32 **Keywords:** Porcine inner ear anatomy, *in vitro* cell culture, cellular characterizations,  
33 multipotent stem/progenitor cells

34

35

36

37

## 38 **Introduction**

39 Human hearing and balance disorders are mostly attributed to damage to the mechanosensory  
40 hair cells (HCs) of the cochlear and vestibular sensory epithelia, respectively. These HCs are  
41 susceptible to a variety of insults including noise, ototoxic compounds, ageing and the  
42 interaction of adverse environmental and genetic factors [1]. Regardless of the cause, lost or  
43 damaged human cochlear HCs are never replaced, and the replacement of vestibular HCs  
44 occurs at levels too low to support significant functional recovery [2, 3]. In mammals,  
45 sensory HCs arise from embryonic progenitor cells during the embryonic period and in some  
46 species such as mice where the ear is not fully developed at birth, also during the early post-  
47 natal period [4]. There is as yet no evidence of newly generated *de-novo* mammalian auditory  
48 HCs in the mature cochlea [5].

49

50 Mammalian vestibular HC regeneration is believed to arise through nonmitotic trans-  
51 differentiation of supporting cells (SCs) [6, 7]. In contrast to mammals, non-mammalian  
52 vertebrates such as birds produce or regenerate auditory HCs after trauma, and thus can  
53 maintain optimum hearing function throughout their lives [8]. The observed patterns of cell  
54 division and differentiation in avian species suggest that their HCs regenerate from  
55 postembryonic progenitor cells [9]. The generation of new HCs from a renewable source of  
56 progenitor cells is a principal requirement for the development of an inner ear cell-based  
57 therapy [10].

58

59 The study of human HCs is severely limited because the cochlea is technically difficult to  
60 access, tissue harvest leads to severe and permanent hearing disability, and surgery involving  
61 inner ear tissue removal is comparatively rare. Hence other species are utilized in  
62 mammalian inner ear research. The mouse is the most commonly studied species due to its

63 small size, high reproductive rate, large reported genetic database, variety of different strains,  
64 and the relatively low cost to procure and maintain study subjects. However, the mouse's  
65 inner ear continues to develop postnatally whilst the human inner ear is fully developed by  
66 the third month of gestation [4] meaning that mice retain the capacity for auditory sensory  
67 HC regeneration after birth in contrast to humans which questions the applicability of  
68 findings based on research on mice to human regenerative therapies.

69

70 The pig has been considered as a superior model for the study of human diseases particularly  
71 for understanding complex conditions such as obesity, arthritis, cardiovascular, skin, and eye  
72 diseases [11]. Pigs have many similarities to human with respect to compatible organ size,  
73 immunology and physiological functions. Their high-quality annotated reference genome  
74 sequence and many known alleles presumed to cause diseases extend the potential of the pig  
75 as a biomedical study model [12, 13]. The morphology and the development of the inner ear  
76 of miniature pigs have been reported to be similar to that of humans [14].

77

78 Our objectives were to develop a viable method to isolate porcine inner ear cells from  
79 postmortem cochlear and vestibular epithelia, document the porcine inner ear anatomical  
80 structure, and report an *in vitro* mixed cell culture model that demonstrated the presence and  
81 persistence of inner ear HC, supporting cell (SC) and stem/progenitor cell characteristics.

82

83

84

85

86

87

## 88 **Materials and Methods**

### 89 **Ethical Approval**

90 This study was approved by the Biosafety Committee of the University of British Columbia  
91 (B14-0048, B18-0048), Vancouver, Canada and by the Animal Research Ethics Review,  
92 University of Bristol, Bristol, United Kingdom. All the experiments were performed in  
93 accordance with host institutional Policies and Procedures, Biosafety Practices and Public  
94 Health Agency of Canada guidelines as required.

95

### 96 **Tissue harvest, isolation and cell culture**

97 Twenty-four temporal bone labyrinth capsules were harvested from 12 adult pigs (*Sus scrofa*)  
98 with ages ranging from 15-19 weeks. Six temporal bone labyrinths were selected at random  
99 for identification of the gross anatomy and histological study. The otic capsule of the  
100 temporal bones were isolated from euthanized adult pigs immediately post-mortem (within 2  
101 hours) and placed in pre-chilled sterile Dulbecco's phosphate-buffered saline (DPBS).

102

103 Four temporal bone labyrinths were used for *in vitro* cell cultures. The helicotrema of the  
104 cochlea was opened and the cochlear duct-extracted piecemeal. Vestibular tissue was  
105 harvested in part via the oval window, and by dissection of the bony semi-circular canals with  
106 special attention to harvesting darkly pigmented vestibular epithelium.

107

108 The harvested tissues were macerated under a dissection microscopic vision, keeping the  
109 cochlear and vestibular tissues separate. Each cochlear and vestibular tissues were collected  
110 in separate 15ml sterile tubes containing 10ml DPBS and 2ml of 0.25% trypsin-EDTA and  
111 then incubated at 37°C for 20-25 minutes for trypsinization. Tissues extracted from two

112 temporal bone labyrinths were preserved separately in RNAlater, a protective reagent, and  
113 stored at  $-80^{\circ}\text{C}$  for subsequent RNA extraction.

114

115 Following incubation, the tubes were centrifuged at  $300 \times g$  for 5 minutes and the resulting  
116 cell pellets were re-suspended in 3ml of growth medium consisting of Dulbecco's Modified  
117 Eagle Medium (DMEM) enriched with 10% Fetal Bovine Serum (FBS). About  $500\mu\text{l}$  of the  
118 cellular suspension was then placed into each well of a 6-well cell culture plate pre-filled  
119 with 1.5ml of fresh growth medium.

120

121 The culture plate was placed into an incubator set at  $37^{\circ}\text{C}$  and  $5\%\text{CO}_2$ . Half of the medium  
122 was replaced after a week taking care not to disturb the growing cells, and after a further 5-7  
123 days all the medium was changed. When the cell growth reached  $>80\%$  confluence  
124 (approximately 3 weeks), the cells were washed with DPBS buffer and trypsinized using  
125  $250\mu\text{l}$  of 0.25% trypsin-EDTA per well and incubated at  $37^{\circ}\text{C}$  for 5 minutes. Trypsinization  
126 was stopped by adding 9 ml of DMEM medium (without 10% FBS) and the pooled  
127 suspension was centrifuged at  $300 \times g$  for 5 minutes. One-third portion of the cell pellet  
128 (passage 0 or P0) was re-suspended in fresh growth medium and placed in  $T_{25}$  vented culture  
129 flasks. The next generation of cells (passage 1 or P1 cells) was allowed to grow until  $>80\%$   
130 confluence was reached.

131

132 The cells were subsequently re-passaged again, up to P6, allowing for  $>80\%$  confluence  
133 before each passage. The morphology of the cochlear and vestibular derived cells were  
134 recorded at each passage by a Phase-contrast Zeiss Axio Vert.A1 inverted microscope. Ultra-  
135 morphological features were obtained by a Scanning Electron Microscope (SEM) - Hitachi  
136 S4700 on passaged cells.



137

138 We have used House Ear Institute-Organ of Corti 1 (HEI-OC1) cells (gifted by Dr. F.  
139 Kalinec), a conditionally immortalized mouse auditory cell line as a positive control for  
140 cellular characterization studies [15]. HEI-OC1 cells were cultured under non-permissive  
141 conditions by incubating at 37°C and 5% CO<sub>2</sub> in T<sub>25</sub> vented culture flasks containing DMEM  
142 medium and 10% FBS without supplements.

143

#### 144 *Scanning electron microscopy on passaged inner ear cell cultures*

145 Ultra-morphological features of P4 passaged porcine inner ear cells and HEI-OC1 cells were  
146 obtained by scanning electron microscopy. The porcine inner ear cells and HEI-OC1 cells  
147 were grown on poly-L-lysine coated cover slips under the above described culture conditions.  
148 At 100% confluence, cells were prepared for SEM [16] as follows: cells were washed using  
149 straight phosphate buffer (pH 7.4) and fixed for 30 minutes with 2.5% glutaraldehyde in 0.1  
150 M sodium cacodylate buffer (pH 7.4), containing 2mM CaCl<sub>2</sub>. After fixation, cells were  
151 washed 3 times with 0.1M sodium cacodylate buffer (pH 7.4), each for 1 minute, post-fixed  
152 for 10-15 minutes with 1% osmium tetroxide (OsO<sub>4</sub>) in the same sodium cacodylate buffer  
153 and then washed. The cells were progressively dehydrated in a graded ethanol series, critical  
154 point-dried using CO<sub>2</sub> and sputter-coated with gold/palladium (Au/Pd). The cells were then  
155 examined using a Hitachi S4700 SEM.

156

#### 157 **Temporal bone sectioning, histology and inner ear anatomy**

158 The bone labyrinths of six temporal bones were obtained as described above and fixed in  
159 37% formaldehyde. The diameters of the six labyrinthine bones were measured with  
160 precision digital calipers. The bones were then decalcified by first immersing in 0.5M EDTA  
161 (pH 8.0) solution for 7 days. This was re-freshed with 0.5M EDTA (pH 8.0) solution for a

162 minimum of four times over the 7 days. The bones were then immersed in 10% sucrose for 2  
163 hours, followed by 20% sucrose for 24 hours and 30% sucrose for 24 hours. Four of the  
164 bones were then placed in an optimum cutting temperature (OCT) medium at room  
165 temperature.

166

167 A round window cochleostomy was fashioned under microscopic control in two of the  
168 cochleas. The length of the cochlea was determined by observing how far the active electrode  
169 array of a standard Nucleus 22 cochlear implant could be inserted via the round window.

170

171 All of the decalcified specimens embedded in OCT were frozen in isopentane held in the  
172 vapour phase of liquid nitrogen. Serial 5 $\mu$ m sections of the bones were cut with a microtome  
173 and placed onto Superfrost Gold slides. Sections were air dried for 48 hours and fixed in  
174 acetone prior to staining with haematoxylin and eosin or haematoxylin/van Gieson stains.

175

## 176 **Cellular characterizations**

### 177 *Fluorescence immunocytochemistry (ICC)*

178 At passages 0, 1 and 4, the cochlear and vestibular cell cultures were examined for the  
179 expression of the inner ear HC markers (myosin VIIa and prestin), SC markers (cytokeratin  
180 18 and vimentin) and multipotent stem/progenitor cell markers (nestin and Sox2). Cells  
181 grown on 8-well chamber slides (Thermo Scientific Nunc; Lab Tek) were immunostained at  
182 confluence  $\geq$ 80%. Initially, culture medium was removed and the cells were washed 3 times  
183 in DPBS, each wash was of 1 minute duration. The cells were then fixed by incubation in 4%  
184 paraformaldehyde for 15 minutes, followed by permeabilization in 0.1% Triton-X 100 for 15  
185 minutes. Thereafter, the cells were blocked using 3% Bovine Serum Albumin (BSA) at room  
186 temperature for 30 minutes prior to incubation at 4°C overnight with primary antibodies

187 [myosin VIIa (inner HC marker) 1:100 dilution (rabbit polyclonal- ab3481, ABCAM); prestin  
188 (outer HC marker) 1:100 dilution (goat polyclonal- SC22692, Santa Cruz Biotechnology);  
189 nestin (stem/progenitor cell marker) 1:100 dilution (rabbit polyclonal- ab92391, ABCAM);  
190 Sox2 (stem/progenitor cell marker) 1:100 dilution (rabbit polyclonal- ab97959 ABCAM);  
191 cytokeratin-18 (an epithelial cell marker) 1:50 dilution (mouse monoclonal - ab668,  
192 ABCAM) and vimentin (mesenchymal cell marker) 1:200 dilution (mouse monoclonal-  
193 ab20346, ABCAM and rabbit polyclonal- PA5-27231, Invitrogen)] dissolved in 3% BSA.

194

195 The following day, primary antibodies were drained and the chamber slides washed 3 times,  
196 each for 1 minute, in DPBS. Then, the cells were incubated at room temperature with  
197 secondary antibodies in the dark [goat anti-rabbit alexa fluor®488 1:500 dilution (ab150113,  
198 ABCAM); goat anti-mouse alexa fluor®488 1:500 dilution (ab150077, ABCAM); donkey  
199 anti-rabbit alexa fluor®488 1:500 dilution (A21206, Invitrogen); donkey anti-mouse alexa  
200 fluor®568 1:500 dilution (A10037, Invitrogen); and donkey anti-goat alexa fluor®488 1:500  
201 dilution (A11055, Invitrogen)], respectively to the primary antibodies and shaken gently for 1  
202 hour. The cells were then mounted with ProLong™ Gold Antifade Mountant with DAPI  
203 (P36931, Invitrogen). Images were captured using a Zeiss Axio Vert.A1 Inverted  
204 Microscope. HEI-OC1 cells served as the positive controls, and cells treated without primary  
205 antibody served as the negative controls.

206

207 ***Quantitative reverse transcription polymerase chain reaction (RT-qPCR) on adult porcine***  
208 ***derived cochlear and vestibular cells***

209 RNA was extracted from tissues and primary cell cultures of adult porcine derived cochlear  
210 and vestibular cells that were grown on T<sub>25</sub> culture flasks. The level of mRNA expression of  
211 target genes *myosin VIIa*, *prestin*, *nestin*, *Sox2*, *cytokeratin 18* and *vimentin* was determined

212 at the tissue level and at passages 0, 2, 4 and 6 using the comparative Cycle threshold ( $\Delta\Delta C_t$   
213 method). A housekeeping gene for these experiments was selected by testing three candidate  
214 genes *glyceraldehyde-3-phosphate dehydrogenase (Gapdh)*, *beta-actin (b-Act)* and  
215 *hypoxanthine phosphoribosyltransferase 1 (Hprt1)* simultaneously. RefFinder, a web-based  
216 tool was used to select the most stable of the candidate housekeeping genes tested by  
217 computing the weighted geometric means of their individual rankings derived by four widely  
218 used methods [17]. Target genes were also determined in positive control HEI-OC1 cells.

219

220 Primer3Plus software [18] was used to design the forward and reverse primers for both  
221 porcine inner ear samples and HEI-OC1 cells (S1 Table and S2 Table, respectively). Primers  
222 were designed for the genes associated with porcine inner ear HCs, SCs and stem/progenitor  
223 cell characteristics using the GenBank (NCBI) database.

224

225 RNAs (RNeasy® mini kit, QIAGEN) were extracted from porcine cochlear and vestibular  
226 tissues preserved in RNAlater held at  $-80^{\circ}\text{C}$  and from porcine (at P0, P2, P4 and P6) and  
227 HEI-OC1 derived cell culture pellets which were dissolved in 350 $\mu\text{l}$  RLT buffer containing  
228 0.01% 14.3M  $\beta$ -mercaptoethanol according to the manufacturer's instruction. The quantity  
229 and quality of extracted RNAs were determined prior to cDNA preparation. We performed  
230 cDNA synthesis with SuperScript™ VILO™ cDNA Synthesis Kit (Invitrogen) under the  
231 following reaction conditions:  $25^{\circ}\text{C}$  for 10 minutes,  $42^{\circ}\text{C}$  for 60 minutes and  $85^{\circ}\text{C}$  for 5  
232 minutes (in a BioRadT100™ Thermal Cycler).

233

234 Synthesized cDNAs were then diluted to a concentration of 5ng/ $\mu\text{l}$  for RT-qPCR in a  
235 StepOnePlus™ Instrument (Applied Biosystems) using 96-well plates and a SYBR Select  
236 Master Mix reagent. In brief, the RT-qPCR reaction mix per well consisted of 1 $\mu\text{l}$  of

237 HyPure™ Molecular Biology Grade Water, 5µl SYBR Select Master Mix at the  
238 manufacturer's supplied concentration, 1µl of each forward and reverse primer (10µM) and  
239 2µl of diluted cDNA (5ng/µl). After the reaction mix was added to the wells, the plate was  
240 centrifuged for few a seconds in a Mini PCR Plate Spinner. A RT-PCR consisted of an initial  
241 denaturing step of 95°C for 10 minutes and followed by 40 amplification cycles of 15  
242 seconds at 95°C and 1minute at 60°C for each cycle. Three replicates were taken from each  
243 sample.

244

245 Relative mRNA levels were determined using the comparative cycle threshold method at a  
246 cut off of Ct <35. The relative mRNA levels were expressed as the mRNA copies of the  
247 genes of interest per 1000 copies of *Hprt1* mRNA [ $2^{-\Delta Ct}/1000 = 1000/2^{\Delta Ct} = 1000/2^{(\text{avg. target}$   
248  $\text{gene Ct} - \text{avg. housekeeping gene Ct})}$ ] [19, 20].

249

## 250 **Statistical Analysis**

251 The differences in the normalized mean Ct values of target genes between porcine cochlear  
252 and vestibular cells, and between porcine cochlear and HEI-OC1 cells were analyzed  
253 statistically using Student's *t*-test at a Benjamini-Hochberg corrected significance level of  $p$   
254  $\leq 0.05$ . The strength of correlation among different target gene expression levels within  
255 porcine cochlear and vestibular cell cultures was analyzed using a non-parametric  
256 Spearman's rank correlation coefficient test. Analyses were conducted using SPSS version  
257 25.0 (IBM Corp., Armonk, New York). The level of statistical significance was set at  $p$   
258  $< 0.01$ .

259

## 260 **Results**

### 261 **Adult porcine inner ear anatomy**

262 Based on six temporal bone labyrinths selected at random from 12 adult pigs, the gross  
263 anatomy of the porcine labyrinth showed some similarity to human's. They both have a  
264 recognizable cochlear spiral though the pig's consisted of 3.5 turns compared to the human's  
265 2.5 turns. There was a separate vestibular compartment arranged in raised bone canals. The  
266 six cochleas were found to have a mean maximal diameter and height of 7.99 and 3.77mm,  
267 respectively (Table 1). Average values  $\pm$  standard error of mean are given. "A" denotes  
268 maximum axial diameter measured from the round window niche to the most lateral part of  
269 the basal turn of the cochlea. "B" denotes vertical axial diameter measured from helicotrema  
270 to the basal turn of the cochlea. "C" denotes short axis diameter measured between two  
271 opposite sides of the basal turn of the cochlea at right angles to measurement A.  
272 Measurements were taken using precision digital calipers to the nearest millimeter. Fig 1A  
273 illustrates how these measurements were made on a demineralised labyrinth.  
274

| <b>Cochlea</b>                             | <b>A</b>           | <b>B</b>           | <b>C</b>           |
|--------------------------------------------|--------------------|--------------------|--------------------|
| 1                                          | 7.97               | 3.72               | 7.38               |
| 2                                          | 8.01               | 3.66               | 7.31               |
| 3                                          | 8.03               | 3.70               | 7.32               |
| 4                                          | 7.97               | 3.95               | 7.40               |
| 5                                          | 7.96               | 3.76               | 7.36               |
| 6                                          | 7.98               | 3.85               | 7.37               |
| Average $\pm$<br>standard error of<br>mean | 7.99 $\pm$ 0.01 mm | 3.77 $\pm$ 0.04 mm | 7.36 $\pm$ 0.01 mm |

275

276 **Table 1: Summary of gross measurements of six porcine inner ear specimens.**

277

278 **Fig 1. Adult porcine inner ear anatomy.** A) A low power (10X) digital photomicrograph  
279 illustrates areas measured on a demineralized porcine inner ear that revealed a cochlea with

280 three and half turns. Measurements were made as follows (in mm): A- Maximum axial  
281 diameter-measured from round window niche to the most lateral part of basal turn of the  
282 cochlea; B- Vertical axial diameter-measured from helicotrema to basal turn of cochlea; C-  
283 Short axis diameter-measured between two opposite sides of the cochlea basal turn at right  
284 angles to A. **B)** A low power (10X) digital photomicrograph of a demineralized porcine inner  
285 ear showing the cochlea and the position of the cochlear implant electrode array. A cochlear  
286 implant electrode array has been inserted through a round window cochleaostomy to  
287 determine the cochlea length. The tip of the implant array can be seen at the helicotrema and  
288 the hub at the level of the round window. **C)** Photomicrograph of a haematoxylin and eosin  
289 stained mid-modiolar section through the *Sus scrofa* cochlea. Cross sectioning of the *S.*  
290 *scrofa* cochlea demonstrates compartments consistent with the scala tympani, media and  
291 vestibuli partitioned by the basilar and Reissner's membranes (indicated by arrows) identical  
292 to the arrangements found in the human cochlea.

293

294 Full insertion of a Nucleus C22 cochlear implant active electrode assembly through a round  
295 window cochleostomy was performed in two specimens such that the marker hub was level  
296 with the bony margin of the round window (Fig 1B). The tip of the electrode could be seen at  
297 the apex of the decalcified labyrinth in each case, leading to the conclusion that the pig's  
298 cochlear duct length is within 25.5-35.1 mm range. A Haematoxylin and Eosin stained cross-  
299 section shows the pig's bony cochlea to be partitioned into three compartments consistent  
300 with the scala tympani, media and vestibuli separated by the basilar and Reissner's  
301 membranes identical to the arrangements in human inner ear (Fig 1C). The cochlear duct  
302 contained abundant tissue for cell culture.

303

304 **Cellular characterizations**

305 ***Morphological characteristics of inner ear cells in in vitro culture***

306 Porcine inner ear cells started to grow within 7-10 days of plating under *in vitro* conditions.  
307 Phase contrast microscopy illustrated that porcine inner ear derived cells at P0 contained a  
308 mixture of spindle shaped and flattened polyhedral shaped cells but by P4 there was a  
309 predominance of spindle shaped cells (Fig 2A to 2D). Proliferating cochlear tissue at P0 and  
310 P4 consisted of cell islands as shown in Fig 2A and 2B, respectively. Cells of similar  
311 appearance were seen in proliferating vestibular tissue at P0 and P4 (Fig 2C and 2D,  
312 respectively). Primary cell cultures consisted of heterogenous cells and formed monolayers  
313 which showed a high level of adhesion onto plastic surfaces. HEI-OC1 cells predominantly  
314 consisted of spindle shaped cells (Fig 2E) similar to P4 and later porcine derived inner ear  
315 cultured cells.

316

317 **Fig 2. Morphology of inner ear *in vitro* cell cultures demonstrated by phase contrast**  
318 **microscopy. A) and C) Proliferating cochlear and vestibular cultures at passage 0; B) and D)**  
319 **Cochlear and vestibular cell cultures consisted of cell islands at passage 4 (indicated by white**  
320 **arrows); E) Positive control HEI-OC1 cells. The magnifications are given in each panel.**

321

322 Porcine inner ear cells and HEI-OC1 cells grown on coated 8-well chamber slides showed  
323 similar sphere-forming characteristics *in vitro* using phase-contrast microscopy (Fig 3A).  
324 SEM revealed that the sphere-forming HEI-OC1 (Fig 3B) porcine cochlear (Fig 3C and  
325 porcine vestibular cells (Fig 3D) were oblong in shape with large and small cytoplasmic  
326 protrusions on their surfaces.

327

328 **Fig 3. Sphere-forming characteristics of inner ear cells in *in vitro* cultures. A) Phase**  
329 **contrast microscopy demonstrated sphere-forming characteristics of porcine inner ear cells**



330 and HEI-OC1 cells grown on coated 8-well chamber slides. **B)** SEM revealed sphere-forming  
331 cells within the HEI-OC1 cultures that demonstrated prominent surface protrusions and  
332 cytoplasmic projections. **C)** Sphere-forming cells in porcine cochlear cultures similarly bore  
333 considerable protrusions on their surfaces and cytoplasmic projections. **D)** Sphere-forming  
334 cells in porcine vestibular cultures were similar though with less protrusions on their surfaces.  
335 Passaged 4 porcine inner ear *in vitro* cultures were used for SEM study.

336

337 Higher resolution SEM images of porcine derived inner ear cells revealed spherical  
338 structures arising from cells with ciliary-type surface projections (Fig 4) *in vitro*. Cells with  
339 ciliary-type projections in HEI-OC1 culture (Fig 4A) and in porcine cochlear culture at P4  
340 (Fig 4B) showed disorganized stereocilia-like structures with appendages suggestive of  
341 broken inter-stereociliary links (indicated by black arrows). Sphere-forming cells in the  
342 porcine vestibular cultures at P4 bore microvillar-like projections that varied in length some  
343 long and others short (Fig 4C).

344

345 **Fig 4. SEM characteristics of cells bearing ciliary-type projections on their surfaces. A)**  
346 **and B)** Higher resolution SEM of sphere-forming cells with disorganized stereocilia-like  
347 structures with broken inter-stereociliary links (indicated by black arrows) in HEI-OC1 and  
348 porcine cochlear cells, respectively. **C)** Porcine vestibular cells are similarly shown to possess  
349 microvillar-like projections on their surfaces that vary in length though lacking any  
350 directional arrangement into rows of increasing length. Passage 4 porcine inner ear *in vitro*  
351 cultures were used for SEM study. Image resolution is indicated in each panel in  
352 micrometers.

353

354 ***Fluorescence immunocytochemistry***

355 Stem/progenitor cell markers nestin and Sox2 were identified in adult derived porcine inner  
356 ear *in vitro* cultures (Fig 5). Nestin positive cells were plentiful in both cochlear (Fig 5A) and  
357 vestibular (Fig 5G) cell cultures at P1 and P4, respectively. Sox2 was localized in the nuclei  
358 of few porcine cochlear (Fig 5C) and vestibular (Fig 5H) cells at P1 and P4, respectively.  
359 More cells in both cochlear and vestibular cultures were positive for nestin rather than for  
360 Sox2 across the passages. Cell islands found in porcine vestibular cultures elicited strong  
361 signals to both nestin and Sox2 markers (indicated by white arrows). HEI-OC1 cells  
362 demonstrated a similar nestin (Fig 5B) and Sox2 (Fig 5D) expression pattern to porcine  
363 cochlear cells. Additionally, some of the globular or spherical shaped cells in porcine inner  
364 ear and HEI-OC1 cell cultures expressed both nestin and Sox2 (indicated by yellow arrows)  
365 markers. SEM demonstrated possible corresponding globular or spherical shaped cells with  
366 protrusions and long villi on their surface in porcine cochlear and HEI-OC1 cell cultures as  
367 shown in Fig 5E and 5F, respectively. These types of cells were observed consistently across  
368 all passages.

369

370 **Fig 5. Presence of multipotent stem/progenitor cells in *in vitro* cultures.** **A)** and **G)** Nestin  
371 positive cells were identified in the cochlear and vestibular cells at passages 1 and 4,  
372 respectively. **C)** and **H)** Sox2 positive nuclei were detected in the cochlear and vestibular  
373 cells at passages 1 and 4, respectively. **B)** Nestin positive cells in HEI-OC1 cells; **D)** Sox2  
374 positive nuclei within the HEI-OC1 cells; **E)** and **F)** SEM images of a globular or spherical  
375 shaped cell with protrusions and long villi on its surface identified within the porcine  
376 cochlear and HEI-OC1 cell cultures, respectively. White arrows indicate the cell islands  
377 positive to both nestin and Sox2 markers within vestibular cultures at passage 4. DAPI was  
378 used to stain the nuclei (blue). Phase contrast microscopic images are given at magnification  
379 400X. SEM image resolution is indicated in each panel in micrometers.

380

381 HC markers myosin VIIa and prestin positive cells were identified in porcine derived inner  
382 ear cell cultures based on immunofluorescence staining, although the intensity and dispersion  
383 varied across the cell passages (Fig 6).

384

385 **Fig 6. Localization of hair cell markers prestin and myosin VIIa.** **A)** and **D)** Prestin  
386 localization identified in proliferating cochlear and vestibular tissues, respectively at passage  
387 0 (indicated by yellow arrows). **B)** and **E)** Prestin plasma membrane localization strongly  
388 detected in cochlear and vestibular cells at passage 4 (indicated by yellow arrows). **C)** Prestin  
389 expression identified in HEI-OC1 cells. **F)** and **G)** Myosin VIIa expressions at passages 0 and  
390 4 identified in cochlear cell cultures. **I)** and **J)** Myosin VIIa expressions at passages 0 and 4  
391 identified in vestibular cell cultures. **G)** Myosin VIIa expression identified in HEI-OC1 cells.  
392 DAPI was used to stain the nuclei (blue). Phase contrast microscopic images are given at  
393 magnification 400X.

394

395 Prestin was localized in proliferating tissues of both the cochlea (Fig 6A) and vestibule (Fig  
396 6D) at P0 and the expression was visibly stronger in cochlear than in vestibular *in vitro*  
397 cultures (indicated by yellow arrows). At P4, prestin expression was localized to the plasma  
398 membrane of cochlear (Fig 6B) and vestibular cells (Fig 6E) as indicated by yellow arrows.  
399 Prestin expression in HEI-OC1 cells was similarly localized as shown in Fig 6C. Prestin  
400 expression levels in both adult porcine derived cochlear and vestibular cells were visibly  
401 stronger than that of the positive control HEI-OC1 cells.

402

403 Myosin VIIa expression was strong and localized within the cytoplasm in adult porcine  
404 derived cochlear (Fig 6F and 6G) and vestibular (Fig 6I and 6J) cultured cells and in HEI-

405 OC1 cells (Fig 6H). In contrast to the prestin marker, at P0, myosin VIIa expression was  
406 widely distributed throughout the porcine cochlear and vestibular derived *in vitro* cultured  
407 cells in keeping with diffuse cytoplasmic apical projections (Fig 6F and 6I, respectively). At  
408 P4, the myosin VIIa expression levels in porcine cochlear and vestibular cells (Fig 6G and 6J,  
409 respectively) were visibly stronger than in HEI-OC1 cells (Fig 6H) or P0 porcine derived  
410 cells. At P4, myosin VIIa positive signals were densely packed in both the porcine cochlear  
411 and vestibular cells compared to P0 cells.

412

413 At P0, SC protein markers, particularly cytokeratin 18 was vigorously expressed compared to  
414 vimentin in both cochlear (Fig 7A and 7B) and vestibular (Fig 7B and 7D) cultures,  
415 respectively. Cytokeratin 18 expressing cells were comparatively larger in size and polyhedral  
416 in shape. Vimentin expressing cells were comparatively smaller in size and mostly spindle  
417 shaped. At P4, vimentin was comparatively strongly expressed in cochlear and vestibular  
418 cells (Fig 7E and 7F, respectively), in contrast, cytokeratin 18 was weakly expressed in both  
419 cochlear and vestibular cells (Fig 7G and 7H, respectively). Vimentin and cytokeratin 18  
420 protein expressions were comparable to each other in HEI-OC1 cells (Fig 7I and 7J,  
421 respectively) and they were smaller in size than porcine cells and mostly spindle shaped.

422

423 **Fig 7. Immunolocalization of supporting cell markers vimentin and cytokeratin 18.**

424 Expression for: **A)** and **B)** vimentin at passage 0 in cochlear and vestibular cultures,  
425 respectively; **C)** and **D)** cytokeratin 18 at passage 0 in cochlear and vestibular cultures,  
426 respectively; **E)** and **F)** vimentin at passage 4 in cochlear and vestibular cultures,  
427 respectively; **G)** and **H)** cytokeratin 18 at passage 4 in cochlear and vestibular cultures,  
428 respectively; **I)** and **J)** vimentin and cytokeratin 18 positive HEI-OC1 cells, respectively.

429 DAPI was used to stain the nuclei (blue). Phase contrast microscopic images are given at  
430 magnification 400X.

431

432 Double antibody labelling for myosin VIIa and cytokeratin 18 elicited strong signals within  
433 the porcine inner ear and HEI-OC1 cell cultures (Fig 8). Porcine vestibular cultures contained  
434 double-labelled epithelial cell islands (Fig 8A) at P4. Similarly, porcine cochlear culture  
435 showed double-labelled cells (Fig 8B) at P4, and the expression patterns were comparable to  
436 HEI-OC1 cells (Fig 8C).

437

438 **Fig 8: Double-labelled immunofluorescence demonstrated the co-localization of inner**  
439 **ear HC and SC markers. A) and B)** Porcine vestibular and cochlear cells demonstrated  
440 dual labelling for antibodies cytokeratin 18 (green) and myosin VIIa (red) at passage 4; **C)**  
441 Double-labelled cells for cytokeratin 18 and myosin VIIa markers in HEI-OC1 cells. Closely  
442 packed myosin VIIa positive apical projections around the nucleus are indicted by yellow  
443 arrows. DAPI was used to stain the nuclei (blue). Phase contrast microscopic images are  
444 given at magnification 400X.

445

#### 446 ***Relative gene expressions***

447 In this study, three housekeeping genes, *b-actin*, *Hprt1* and *Gapdh*, were tested to determine  
448 RNA expression stability for RT-qPCR data normalization in cochlear and vestibular cell  
449 cultures throughout the passages. In cochlear cell cultures, from harvested tissues to P6, mean  
450 Ct value  $\pm$  standard deviation (S.D.) for *Hprt1* was  $23.41 \pm 1.01$ , *Gapdh* was  $16.59 \pm 1.63$ ,  
451 and *b-Act* was  $14.38 \pm 2.18$ . In vestibular cell cultures, from harvested tissues to P6, mean Ct  
452 value  $\pm$  S.D. for *Hprt1* was  $22.4 \pm 1.01$ , *Gapdh* was  $15.71 \pm 1.58$ , and *b-Act* was  $13.76 \pm$   
453  $2.52$ . *Hprt1* mRNA expression was most stable across the passages, compared to *Gapdh* and

454 *b-Act*. RefFinder software ranked the prospective housekeeping genes in order of the most to  
455 the least stable as *Hprt1*, *Gapdh* and *b-actin*.

456

457 The relative mRNA levels of these genes in harvested cochlea and vestibule membranous  
458 tissues are illustrated (Fig 9A). The targeted genes normalized mean Ct values when  
459 compared between cochlear and vestibular harvested tissues, demonstrated that *myosin VIIa*  
460 expression levels in cochlear and vestibular tissues were almost identical ( $p = 0.947$ ),  
461 whereas *prestin* expression was greater in cochlear tissue with a statistical significance at  $p =$   
462  $0.029$ . Gene *Sox2* ( $p = 0.036$ ) was significantly highly expressed in vestibular tissue whereas  
463 genes *nestin* ( $p = 0.113$ ), *cytokeratin 18* ( $p = 0.12$ ) and *vimentin* ( $p = 0.059$ ) were not  
464 significantly different between porcine cochlear and vestibular harvested tissues.

465

466 **Fig 9. Relative gene expressions within cochlear (blue) and vestibular (orange) *in vitro***  
467 **cell cultures. A)** Relative mRNA levels of *myosin VIIa*, *prestin*, *nestin*, *Sox2*, *cytokeratin 18*  
468 and *vimentin* are presented for harvested adult porcine cochlea and vestibule in log base 2. **B)**  
469 to **G)** Relative mRNA levels of *myosin VIIa*, *prestin*, *nestin*, *Sox2*, *cytokeratin 18* and  
470 *vimentin* in *in vitro* cultures. Gene *hypoxanthine phosphoribosyltransferase 1 (Hprt1)* was  
471 used as an endogeneous control. Positive control was HEI-OC1 cells (indicated by black).  
472 Number of replicates were three and the error bars represented the standard error.

473

474 The target genes' normalized mean Ct values varied between porcine cochlear and vestibular  
475 cells. *myosin VIIa* expression was significantly highly expressed at P4 ( $p = 0.000006$ ) in  
476 cochlear compared with vestibular cells (Fig 9B). Similarly, *prestin* expression was  
477 significantly highly expressed at P4 ( $p = 0.00003$ ) and at P6 ( $p = 0.024$ ) in cochlear compared  
478 with vestibular cells (Fig 9C). Genes *Sox2* (Fig 9E) and *cytokeratin 18* (Fig 9F) were

479 significantly highly expressed in cochlear cells at all tested passages: P0 ( $p = 0.017$ ,  $p =$   
480  $0.04$ ), P2 ( $p = 0.001$ ,  $p = 0.011$ ), P4 ( $p = 0.00005$ ,  $p = 0.00004$ ) and P6 ( $p = 0.0001$ ,  $p =$   
481  $0.0002$ ), respectively. *Nestin* at P2 ( $p = 0.015$ ) and P4 ( $p = 0.01$ ) (Fig 9D) and *vimentin* at P0  
482 ( $p = 0.008$ ) and P4 ( $p = 0.005$ ) (Fig 9G) were also significantly highly expressed in cochlear  
483 compared with vestibular cells.

484

485 The normalized mean Ct values of all tested genes in porcine cochlear cells were significantly  
486 different ( $p < 0.05$ ) across the passages 0 to 6 when compared with HEI-OC1 cells except for  
487 *nestin* expression at P6 ( $p = 0.26$ ) and *vimentin* expression at P0 ( $p = 0.42$ ) (Fig 9D and 9G,  
488 respectively). *Prestin* gene expression was undetectable in HEI-OC1 cells, thus statistical  
489 analysis was not performed.

490

491 The level of expression of of *cytokeratin 18*, and both HC markers *myosin VIIa* and *prestin*  
492 were significantly positively correlated [ $p = 0.005$ , Spearman correlation ( $\tau$ ) = 0.943] in  
493 porcine cochlear cultures, from harvested tissue to P6. Genes *myosin VIIa* and *prestin*  
494 expressions demonstrated a significant positive correlation in both porcine cochlear ( $p =$   
495  $0.019$ ,  $\tau = 0.886$ ) and vestibular ( $p = 0.005$ ,  $\tau = 0.943$ ) cultures, from harvested tissue to P6.  
496 Porcine vestibular cultures also demonstrated a significant positive correlation between *nestin*  
497 and *prestin* mRNA levels from harvested tissue to P6 ( $p = 0.019$ ,  $\tau = 0.886$ ).

498

## 499 **Discussion**

500 We demonstrated that the pig's labyrinth was anatomically similar to that of the human's  
501 which is consistent with other studies [21, 22]. The maximal transverse and vertical axial  
502 diameters of the pig's cochleas sampled are consistent with the findings reported in a large  
503 series of human cochleas [23]. Our use of an inserted cochlear implant electrode ascertained

504 the length of the pig's cochlea duct as 35mm in two specimens which is within the range of  
505 lengths of the human cochleas based on anatomical studies [24] and the mean lengths derived  
506 from CT data [25]; 28.0-40.1 mm and 34.62 mm, respectively. These findings indicate that  
507 the pig's cochlear dimensions (length and cross sectional diameter) are similar to those of the  
508 human cochlea.

509

510 The development, function, and maintenance of inner ear sensory epithelia are heavily  
511 dependent upon the SCs [26], which are crucial in cochlea homeostasis. Hence, our aim was  
512 to develop an *in vitro* multi-cellular culture which mirrors the complexity of the human inner  
513 ear to facilitate the use of these cells in studies of hearing and balance disorders. Our findings  
514 indicate that primary cell cultures of adult porcine derived inner ear cochlear and vestibular  
515 cells are heterogeneous, highly adherent to plastic surfaces and demonstrate the presence of  
516 inner ear HC, SC and multipotent stem/progenitor cell characteristics based on SEM,  
517 fluorescence immunocytochemistry and RT-qPCR.

518

519 Sphere-forming cells were observed in both porcine cochlear and vestibular cell cultures and  
520 were similar to those observed in HEI-OC1 cultures. This suggests that these cultures  
521 contain cells with or that develop stem-like properties in the culture conditions we utilised. It  
522 remains unclear whether mammalian inner ear sphere-forming cells are endogenous stem  
523 cells or derived from SCs. In non-mammalian vertebrates such as birds, fish and amphibians,  
524 SCs are the most likely source of progenitor cells within the inner ear sensory epithelia [9].  
525 These SCs can generate new HCs either via a regenerative response of dedifferentiation,  
526 proliferation and differentiation, or a direct phenotype conversion called trans-differentiation  
527 [9, 27]. It has been reported that vestibular sensory epithelia SCs display stem cell  
528 characteristics in mature guinea pigs and in adult humans *in vitro* [2, 3]. In mice, adult



529 vestibular SCs replace damaged HCs to a certain extent [28], in contrast, cochlear SCs lose  
530 this capacity during the first few neonatal weeks as the inner ear completes its maturation  
531 [28-30]. Recent demonstrations of spontaneous HC regeneration in the immature neonatal  
532 mouse cochlea suggest that progenitor cells in that species are generated primarily by trans-  
533 differentiation of SCs and not by the proliferation of existing stem cells or dedifferentiation  
534 of SCs into stem cells [31, 32]. Although SCs with the capability for phenotypic conversion  
535 to HCs have been identified, such capability within the organ of Corti is only demonstrated in  
536 prenatal and neonatal rodent models where HCs and SCs are still developing [33-35]. Since  
537 the early postnatal cochlea of the mouse is immature, the relevance of these findings to  
538 regenerative therapies in adult humans is unclear [36].

539

540 In most previous studies, inner ear multipotent cells were induced to differentiate into cells  
541 expressing HC markers in part by adhesion to substrates, such as poly-D-lysine [37], poly-L-  
542 lysine [38, 28], fibronectin [39] and laminin [40]. Liu et al. [38] promoted differentiation of  
543 inner ear multipotent cells derived from postnatal day 0 mice cochlear sensory epithelia into  
544 functional HC-like cells containing characteristic stereocilia bundles through a two-step-  
545 induction method. Ding et al. [40] described similar techniques that induced the conversion  
546 of human embryonic stem cells into otic epithelial progenitors (OEPs) followed by the  
547 induced differentiation of OEPs into HC-like cells not only by substrate selection but also the  
548 deployment of conditioned media containing epidermal growth factor and all-trans retinoic  
549 acid. We did not use any growth factor media beyond DMEM plus 10% FBS and obtained  
550 HC-like cells from adult porcine inner ear cells which were similar on SEM to the HC-like  
551 cells obtained by Liu et al. [38] and Ding et al. [40]. Ding et al. [40] however demonstrated  
552 that HC-like cells that were induced on a substrate of mitotically inactivated chicken utricle  
553 stromal cells were functional and displayed more organized surface ciliary architecture than

554 those that were induced on a poly-L-lysine substratum. They hypothesized that stromal  
555 substrate cells may release factors that are important for the development of functional HCs.  
556 Although, the HC-like cells that we generated displayed similar SEM characteristics, further  
557 work is required to determine their functional status. Importantly, we utilized the multiple  
558 cell types present in the inner ear as the starting point for our experiments thus we submit that  
559 any necessary factors that Ding et al. [40] hypothesized to be present in their utricle stromal  
560 cell substrate may be present in our *in vitro* cultures. Nonetheless these observations  
561 demonstrate a more direct method of generating HC-like cells from postmortem adult porcine  
562 labyrinth specimens than previously described techniques.

563

564 Immunofluorescence staining and RT-qPCR revealed that nestin was strongly expressed in  
565 both porcine cochlear and vestibular cultures across the passages 0 to 6 comparable to that  
566 seen in HEI-OC1 cell cultures. Nestin-positive cells have been found in tissue or organ-  
567 specific sites, where they serve as quiescent cells capable of proliferation, differentiation, and  
568 migration after their reactivation [41]. Nestin is associated with pluripotency in embryonic  
569 and induced pluripotent stem cells, as well as multipotency in spiral ganglion cells of the  
570 mature mouse [42]. Several studies have shown that nestin-positive cells derived from inner  
571 ear cells or embryonic stem cells serve as progenitors for sensory HC-like cells [43-45].  
572 Chow et al. [42] found nestin-expressing cells adjacent to the inner HC layer in postnatal and  
573 young adult mice. Nestin-positive cells in the mature rat cochlea have been identified as SCs  
574 situated laterally, adjacent to outer HCs in the cochlea apex [46]. Lou et al.'s [47] study on  
575 cultivated cochlear cells derived from adult and neonatal mice suggests that stem/progenitor  
576 cells maintained their stemness but eventually lose the potential to differentiate into other cell  
577 types with age. Therefore, we propose that the strong nestin-expressing cells in porcine inner  
578 ear and HEI-OC1 cell cultures are multi- or oligo-potent progenitors that generate HC and

579 SC-like inner ear cells especially when grown on poly-L-lysine coated surfaces. However,  
580 more work is required to identify the location and specific cell type(s) which demonstrate  
581 stem/progenitor cell activity within the porcine inner ear.

582

583 Mammalian stereocilia contain myosin VIIa which maintains the structural integrity of the  
584 HC bundles [48, 49]. HC-like cells with disorganized stereocilia were identified by SEM in  
585 the passaged porcine *in vitro* cultures. We also undertook SEM on cultured HEI-OC1 cells  
586 which to our knowledge has not been previously reported and found HC-like with  
587 disorganized stereocilia similar to those in the porcine cultures. Although, myosin VIIa  
588 positive cells were identified using ICC in both porcine cochlear and vestibular cells from  
589 passages 0 through 6, relative *myosin VIIa* mRNA expression was identified at lower levels  
590 in passaged cultures than expected based on the ICC and SEM findings. The high number of  
591 HC-like cells on SEM and ICC may be due to the poly-L-lysine coating on the slides and  
592 coverslips used for these experiments as this substrate has been previously demonstrated to  
593 induce the conversion of multipotent stem/progenitor cells into HC-like cells [38, 40].  
594 Similarly as the cell culture flasks used for qPCR were not coated with poly-L-lysine the  
595 same degree of induction of HC-like cells will not have occurred. Alternatively the  
596 differences in myosin VIIa cellular protein distribution and mRNA concentration may be a  
597 reflection of differences in the degree to which the cultured HC-like cells have differentiated  
598 to resemble functional HCs.

599

600 The co-localization of myosin VIIa and cytokeratin 18 in porcine cochlear and vestibular  
601 cells is consistent with that expected in immature HCs as cytokeratin is abundant in HC  
602 progenitor cells after which the level decreases progressively as HCs mature until it is no  
603 longer present in mature HCs [50]. The significant positive correlation between *cytokeratin*

604 *18* and *myosin VIIa* mRNA expressions within the porcine cochlear cultures further supports  
605 the presence of immature HC-like cells across the passages.

606

607 The outer HC marker prestin belongs to the mammalian SLC26 family [51]. Recently, Park et  
608 al. [52] studied the HEI-OC1 auditory cells as a model for investigating prestin function.

609 They confirm that under permissive conditions (33°C, 10% CO<sub>2</sub>), a condition in which HEI-

610 OC1 cells proliferate *in vitro*, prestin is expressed mostly in the cytoplasm; in contrast, under

611 non-permissive conditions (39°C, 5% CO<sub>2</sub>), a condition in which HEI-OC1 cells differentiate

612 *in vitro*, total prestin expression is increased and localized to the plasma membrane. Our cell

613 culture conditions (37°C, 5% CO<sub>2</sub>) are close to non-permissive conditions and we observed

614 strong prestin expression in the plasma membranes of both adult porcine inner ear cells and

615 HEI-OC1 cells *in vitro*. Similar to Adler et al. [53], we identified prestin protein in vestibular

616 cell cultures; although prestin is primarily designated as an outer HC motor protein of the

617 mammalian cochlea. The relative *prestin* mRNA level decreased from harvested tissues

618 through P6 cell cultures and was undetectable in HEI-OC1 cells; however, plasma membrane

619 prestin protein localization persisted across the passages when grown on coated 8-well

620 chamber slides. These findings provide further evidence that the HC-like cells observed on

621 SEM analysis of the porcine cell cultures grown on coated slides or cover slips possess

622 differentiated HC-like characteristics.

623

624 The adult porcine derived inner ear cell *in vitro* cultures displayed a higher level of vimentin

625 mRNA than the level in the harvested tissues. This may be a reflection of a high level of

626 proliferation in the cultured cells as *vimentin* is associated with mitosis and cell growth [54].

627 Vimentin is present in several inner ear cell types which means that it lacks specificity as a

628 marker of a single cell type. The cytoplasm of mammalian inner ear SCs including Deiters

629 and inner pillar cells are vimentin rich [55] and in addition contain cytokeratin. Spiral  
630 ligament fibrocytes amongst others are a rich source of fibroblasts. In addition, the culture  
631 media contained FBS supplement a promoter of fibroblastic proliferation. Therefore the  
632 combination of a number of *vimentin* expressing cell types all of which are rapidly dividing  
633 may account for the increased *vimentin* mRNA levels in the cultured cells compared to the  
634 harvested tissues.

635

636 To our knowledge, housekeeping genes for RT-qPCR studies on porcine derived inner ear  
637 cells have not been previously published. We identified *Hprt1* as a suitable housekeeping  
638 gene for investigating genes in porcine inner ear tissue by comparison with *Gapdh* and *b-Act*  
639 which is consistent with Nygard et al.'s findings in other porcine tissues [56].

640

## 641 **Conclusion**

642 Taken together, the similarity of the pig's inner ear anatomy and cellular composition to that  
643 of humans suggest that the domestic pig can be considered as an animal model for the study  
644 of human inner ear disorders. Our findings suggest that adult porcine cochlea and vestibule  
645 tissue have the capacity to form new HC populations. Furthermore, we found evidence for  
646 multipotent stem/progenitor cells in adult derived inner ear *in vitro* cultures though additional  
647 work is required to identify the cell type(s) and the location of these cells within the porcine  
648 inner ear.

649

## 650 **Conflicts of Interest**

651 The authors have declared that no competing interests exist.

652

## 653 **Acknowledgements**

654 The authors thank Dr. F. Kalinec, Laboratory Auditory Cell Biology, Dept. of Head & Neck  
655 Surgery, David Geffen Scholl of Medicine at UCLA, Los Angeles, CA, USA for gifting HEI-  
656 OC1 cells. Our sincere thanks to Mr. Derrick Horne, Technical Specialist, UBC Bioimaging  
657 Facility, Vancouver Campus for his technical assistance to carry out the scanning electron  
658 microscopy on passaged in inner ear cell *in vitro* cultures.

659

#### 660 **Funding Statement**

661 We acknowledge the funding agencies: North Bristol NHS Trust Small Grant Scheme RD47,  
662 Bristol, United Kingdom; North Bristol NHS Trust Department of Otolaryngology  
663 Postgraduate Study Grant, Bristol, United Kingdom; Vancouver Coastal Health Research  
664 Institute 20R22867, Vancouver, Canada; Rotary Hearing Foundation, Vancouver, Canada;  
665 and Pacific Otolaryngology Foundation, Vancouver, Canada for their financial support.

666

#### 667 **Author contributions**

668 D.A.N. proposed the study and obtained funding. D.A.N., A.S., T.A.C. and P.W. designed  
669 the experiments and interpreted the results. P.W. and A.S. drafted the paper. D.A.N. and E.H.  
670 revised the paper. A.S., T.A.C., P.W., B.Z., E.H., G.H. and J.K. developed the cell cultures.  
671 P.W. performed the cellular characterization studies. P.W. analysed the data. A.S. and T.A.C.  
672 performed the anatomical studies. All authors reviewed the final manuscript.

673

#### 674 **References**

- 675 1) Muller U, Barr-Gillespie PG. New treatment options for hearing loss. Nat Rev Drug  
676 Discov. 2015 Mar 20;14(5):346-65. PMID: 25792261.
- 677 2) Forge A, Li L, Nevill G. Hair cell recovery in the vestibular sensory epithelia of mature  
678 guinea pigs. J Comp Neurol. 1998 Jul 20; 397(1):69-88. PMID: 9671280.

- 679 3) Warchol ME, Lambert PR, Goldstein BJ, Forge A, Corwin JT. Regenerative proliferation  
680 in inner ear sensory epithelia from adult guinea pigs and humans. *Science*. 1993 Mar 12;  
681 259(5101):1619-22. PMID: 8456285.
- 682 4) Taylor RR, Jagger DJ, Saeed SR, Axon P, Donnelly N, Tysome J, et al. Characterizing  
683 human vestibular sensory epithelia for experimental studies: new hair bundles on old tissue  
684 and implications for therapeutic interventions in ageing. *Neurobiol Aging*. 2015  
685 Jun;36(6):2068-84. PMID: 25818177.
- 686 5) Golden EJ, Benito-Gonzalez A, Doetzlhofer A. The RNA-binding protein LIN28B  
687 regulates developmental timing in the mammalian cochlea. *Proc Natl Acad Sci USA*. 2015  
688 Jul 2;112(29):E3864-73. PMID: 26139524.
- 689 6) Lin V, Golub JS, Nguyen TB, Hume CR., Oesterle EC, Stone JS. Inhibition of Notch  
690 activity promotes nonmitotic regeneration of hair cells in the adult mouse utricles. *J Neurosci*.  
691 2011 Oct 26;31(43):15329–39. PMID: 22031879.
- 692 7) Li L, Forge A. Morphological evidence for supporting cell to hair cell conversion in the  
693 mammalian utricular macula. *Int J Dev Neurosci*. 1997 Jul;15(4-5):433–46. PMID: 9263024 .
- 694 8) Corwin JT, Oberholtzer JC. Fish n’ chicks: model recipes for hair cell regeneration?  
695 *Neuron*. 1997 Nov;19(5):951-4. PMID: 9390508.
- 696 9) Rubel EW, Furrer SA, Stone JS. A brief history of hair cell regeneration research and  
697 speculations on the future. *Hear Res*. 2013 Mar;297:42-51. PMID: 23321648.
- 698 10) Savary E, Hugnot JP, Chassigneux Y, Travo C, Duperray C, Van De Water T, et al.  
699 Distinct population of hair cell progenitors can be isolated from the postnatal mouse cochlea  
700 using side population analysis. *Stem Cells*. 2007 Feb;25(2):332–9. PMID: 17038670.
- 701 11) Humphray SJ, Scott CE, Clark R, Marron B, Bender C, Camm N, et al. A high utility  
702 integrated map of the pig genome. *Genome Biol*. 2007 Jul 11;8(7):R139. PMID: 17625002.

- 703 12) Gutierrez K, Dicks N, Glanzner WG, Agellon LB, Bordignon V. Efficacy of the porcine  
704 species in biomedical research. *Front Genet.* 2015 Sep 16;(6):293. PMID: 26442109.
- 705 13) Groenen MA, Archibald AL, Uenishi H, et al. Analyses of pig genomes provide insight  
706 into porcine demography and evolution. *Nature.* 2012 Nov 15;491(7424):393-8. PMID:  
707 23151582.
- 708 14) Guo W, Yi H, Ren L, Chen L, Zhao L, Sun W, et al. The morphology and  
709 electrophysiology of the cochlea of the miniature pig. *Anat Rec.* 2015 Mar;298(3):494-500.  
710 PMID: 25394601.
- 711 15) Kalinec GM, Park C, Thein P, Kalinec F. Working with auditory HEI-OC1 cells. *J Vis*  
712 *Exp.* 2016 Sep 3;115:54425. PMID: 27684094.
- 713 16) Li Y, Jia S, Liu H, Tateya T, Guo W, Yang S, et al. Characterization of hair cell-like cells  
714 converted from supporting cells after notch inhibition in cultures of the organ of Corti from  
715 Neonatal Gerbils. *Front Cell Neurosci.* 2018 Mar 20;12:73. PMID: 29662441.
- 716 17) Xie F, Xiao P, Chen D, Xu L, Zhang B. miRDeepFinder: a miRNA analysis tool for deep  
717 sequencing of plant small RNAs. *Plant Mol Biol.* 2012 Jan 31;80:75-84. PMID: 22290409.
- 718 18) Untergasser A, Nijveen H, Rao X, Bisseling T, Geurts R, Leunissen JA. Primer3Plus, an  
719 enhanced web interface to Primer3. *Nucleic Acids Res.* 2007 Jul;35:W71-4. PMID:  
720 17485472.
- 721 19) Huang Y, Litvinov IV, Wang Y, Su MW, Tu P, Jiang X, et al. Thymocyte selection-  
722 associated high mobility group box gene (TOX) is aberrantly over-expressed in mycosis  
723 fungoides and correlates with poor prognosis. *Oncotarget.* 2014 Jun 30;5:4418-25. PMID:  
724 24947046.
- 725 20) Schmittgen TD, Livak KJ. Analyzing real-time PCR data by the comparative C(T)  
726 method. *Nat Protoc.* 2008 Jun 5;3(6):1101-8. PMID: 18546601.



- 727 21) Yi H, Guo W, Chen W, Chen L, Ye J, Yang S. Miniature pigs: a large animal model of  
728 cochlear implantation. *Am J Transl Res*. 2016 Dec 15;8(12):5494-502. PMID: 28078020.
- 729 22) Gurr A, Kevenhorster K, Stark T, Pearson M, Dazert S. The common pig: a possible  
730 model for teaching ear surgery. *Eur Arch Oto-rhino-laryngol*. 2010 Jul 12;267(2):213-7.  
731 PMID: 19597737.
- 732 23) Dimopoulos P, Muren C. Anatomic variations of the cochlea and relations to other  
733 temporal bone structures. *Acta Radiol*. 1990 Sep;31(5):439-44. PMID: 2261286.
- 734 24) Ulehlová L, Voldrich L, Janisch R. Correlative study of sensory cell density and cochlear  
735 length in humans. *Hear Res*. 1987;28(2-3):149-51. PMID: 3654386.
- 736 25) Skinner MW, Ketten DR, Holden LK, Harding GW, Smith PG, Gates GA, et al. CT-  
737 derived estimation of cochlear morphology and electrode array position in relation to word  
738 recognition in Nucleus-22 recipients. *J Assoc Res Otolaryngol*. 2002 Sep 3;3(3):332-50.  
739 PMID: 12382107.
- 740 26) Wan G, Corfas G, Stone, J S. Inner ear supporting cells: Rethinking the silent majority.  
741 *Semin Cell Dev Biol*. 2013 May;24(5):448-59. PMID: 23545368.
- 742 27) Adler HJ, Raphael Y. New hair cells arise from supporting cell conversion in the  
743 acoustically damaged chick inner ear. *Neurosci Lett*. 1996 Feb 16;205(1):17-20. PMID:  
744 8867010.
- 745 28) Oshima K, Grimm CM, Corrales CE, Senn P, Monedero RM, Géléoc GSG, et al.  
746 Differential distribution of stem cells in the auditory and vestibular organs of the inner ear. *J*  
747 *Assoc Res Otolaryngol*. 2007 Mar;8(1):18-31. PMID: 17171473.
- 748 29) Doetzlhofer A, White P, Lee YS, Groves A, Segil N. Prospective identification and  
749 purification of hair cell and supporting cell progenitors from the embryonic cochlea. *Brain*  
750 *Res*. 2006 May 26;1091(1):282-8. PMID: 16616734.

- 751 30) White PM, Doetzlhofer A, Lee YS, Groves A, Segil N. Mammalian cochlear supporting  
752 cells can divide and trans-differentiate into hair cells. *Nature*. 2006 Jun 22;441(7096):984-7.  
753 PMID: 16791196.
- 754 31) Bramhall NF, Shi F, Arnold K, Hochedlinger K, Edge AS. Lgr5-positive supporting cells  
755 generate new hair cells in the postnatal cochlea. *Stem Cell Rep*. 2014 Mar 11;2(3):311-22.  
756 PMID: 24672754.
- 757 32) Cox BC, Chai R, Lenoir A, Liu Z, Zhang L, Nguyen DH, et al. Spontaneous hair  
758 regenerations in the neonatal mouse cochlea in vivo. *Development*. 2014 Feb;141(4):816-29.  
759 PMID: 24496619.
- 760 33) Xu J, Ueno H, Xu CY, Chen B, Weissman IL, Xu PX. Identification of mouse cochlear  
761 progenitors that develop hair and supporting cells in the organ of Corti. *Nat Commun*. 2017  
762 May 11;8:15046. PMID: 28492243.
- 763 34) Gubbels SP, Woessner DW, Mitchell JC, Ricci AJ, Brigande JV. Functional auditory hair  
764 cells produced in the mammalian cochlea by in utero gene transfer. *Nature*. 2008 Sep  
765 25;455(7212):537-41. PMID: 18754012.
- 766 35) Zheng JL, Gao WQ. Overexpression of Math 1 induces robust production of extra hair  
767 cells in postnatal rat inner ears. *Nat Neurosci*. 2000 Jun;3(6):580-6. PMID: 10816314.
- 768 36) Takeda H, Dondzillo A, Randall JA, Gubbels SP. Challenges in cell-based therapies for  
769 the treatment of hearing loss. *Trends Neurosci*. 2018 Nov;41(11):823-37. PMID: 30033182.
- 770 37) Diensthuber M, Oshima K, Heller S. Stem/progenitor cells derived from the cochlear  
771 sensory epithelium give rise to spheres with distinct morphologies and features. *J Assoc Res*  
772 *Otolaryngol*. 2009 Jun;10(2):173-90. PMID: 19247714.
- 773 38) Liu Q, Shen Y, Chen J, Ding J, Tang Z, Zhang C, et al. Induction of functional hair-cell-  
774 like cells from mouse cochlear multipotent cells. *Stem Cells Int*. 2016 Dec 29;2016:8197279.  
775 PMID: 27057177.

- 776 39) Savary E, Sabourin JC, Santo J, Hugnot JP, Chabbert C, Van de Water T, et al. Cochlear  
777 stem/progenitor cells from a postnatal cochlea respond to Jagged1 and demonstrate that notch  
778 signaling promotes sphere formation and sensory potential. *Mech Dev.* 2008  
779 Aug;125(8):674–86. PMID: 18571907.
- 780 40) Ding J, Tang Z, Chen J, Shi H, Chen J, Wang C, et al. Induction of differentiation of  
781 human embryonic stem cells into functional hair-cell-like cells in the absence of stromal  
782 cells. *Int J Biochem Cell Biol.* 2016 Dec;81(Pt A):208-22. PMID: 26615761.
- 783 41) Wiese C, Rolletschek A, Kania G, Blyszczuk P, Tarasov KV, Tarasova Y, et al. Nestin  
784 expression—a property of multi-lineage progenitor cells? *Cell Mol Life Sci.* 2004 Oct;61(19-  
785 20):2510-22. PMID: 15526158.
- 786 42) Chow C L, Trivedi P, Pyle MP, Matulle JT, Fettiplace R, Gubbels SP. Evaluation of  
787 nestin expression in the developing and adult mouse inner ear. *Stem Cells Dev.* 2016 Oct  
788 1;25(19):1419-32. PMID: 27474107.
- 789 43) Oiticica J, Barboza-Junior LCM, Batissoco AC, Lezirovitz K, Mingroni-Netto RC,  
790 Haddad LA, et al. Retention of progenitor cell phenotype in otospheres from guinea pig and  
791 mouse cochlea. *J Transl Med.* 2010 Nov 18;8:119. PMID: 21087511.
- 792 44) Li H, Roblin G, Liu H, Heller S. Generation of hair cells by step wise differentiation of  
793 embryonic stem cells. *Proc Natl Acad Sci USA.* 2003 Nov 11;100(23):13495-500. PMID:  
794 14593207.
- 795 45) Malgrange B, Belachew S, Thiry M, Nguyen L, Rogister B, Alvarez ML, et al.  
796 Proliferative generation of mammalian auditory hair cells in culture. *Mech Dev.* 2002  
797 Mar;112(1-2):79-88. PMID: 11850180.
- 798 46) Watanabe R, Morell MH, Miller JM, Kanicki AC, O'Shea KS, Altschuler RA, et al.  
799 Nestin-expressing cells in the developing, mature and noise-exposed cochlear epithelium.  
800 *Mol Cell Neurosci.* 2012 Feb;49(2):104-9. PMID: 22122823.

- 801 47) Lou X, Dong Y, Xie J, Wang X, Yang L, Tokuda M, et al. Comparing the cultivated  
802 cochlear cells derived from neonatal and adult mouse. *J Transl Med.* 2014 May 29;12:150.  
803 PMID: 24884939.
- 804 48) Hasson T, Heintzelman MB, Santos-Sacchi J, Corey DP, Mooseker MS. Expression of  
805 cochlea and retina of myosin VIIa, the gene product defective in Usher syndrome type 1B.  
806 *Proc Natl Acad Sci USA.* 1995 Oct 10;92(21):9815-9. PMID: 7568224.
- 807 49) Hasson T, Gillespie PG, Garcia JA, MacDonald RB, Zhao Y, Yee AG, et al.  
808 Unconventional myosins in inner ear sensory epithelia. *J Cell Biol.* 1997 Jun 16;137(6):1287-  
809 307. PMID: 9182663.
- 810 50) Cyr JL, Bell AM, Hudspeth AJ. Identification with a recombinant antibody of an inner-  
811 ear cytokeratin, a marker for hair-cell differentiation. *Proc Natl Acad Sci USA.* 2000 Apr  
812 25;97(9):4908-13. PMID: 10758152.
- 813 51) Keller JP, Homma K, Duan C, Zheng J, Cheatham MA, Dallos P. Functional regulation  
814 of the SLC26-family protein prestin by calcium/calmodulin. *J Neurosci.* 2014 Jan  
815 22;34(4):1325-32. PMID: 24453323.
- 816 52) Park C, Thein P, Kalinec G, Kalinec F. HEI-OC1 cells as a model for investigating  
817 prestin function. *Hear Res.* 2016 May;335:9-17. PMID: 26854618.
- 818 53) Adler HJ, Belyantseva IA, Merritt RC, Frolenkov GI Jr, Dougherty GW, Kachar B.  
819 Expression of prestin, a membrane motor protein, in the mammalian auditory and vestibular  
820 periphery. *Hear Res.* 2003 Oct;184(1-2):27-40. PMID: 14553901.
- 821 54) Chou YH, Bischoff JR, Beach D, Goldman RD. Intermediate filament reorganization  
822 during mitosis is mediated by p34cdc2 phosphorylation of vimentin. *Cell.* 1990 Sep  
823 21;62(6):1063-71. PMID: 2169348.
- 824 55) Yamasoba T, Kondo K. Supporting cell proliferation after hair cell injury in mature  
825 guinea pig cochlea in vivo. *Cell Tissue Res.* 2006 Jul;325(1):23-31. PMID: 16525832.

826 56) Nygard AB, Jorgensen CB, Cirera S, Fredholm M. Selection of reference genes for gene  
827 expression studies in pig tissue using SYBR green qPCR. BMC Mol Biol. 2007 Aug 15;8:67.

828 PMID: 17697375.

829

830

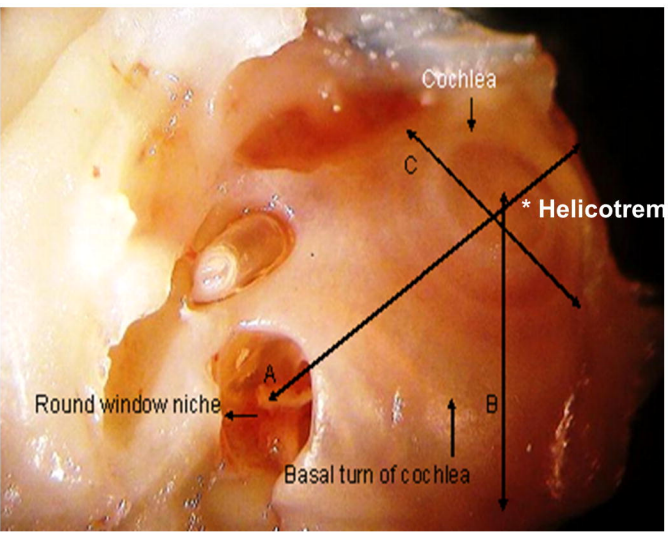

**A**

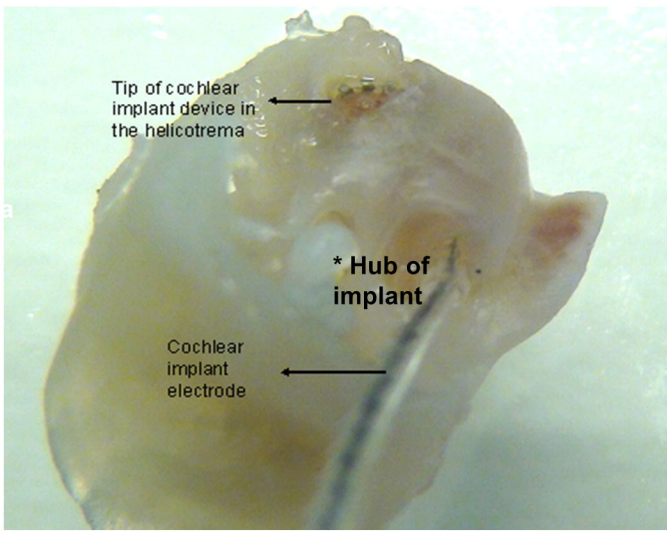

**B**

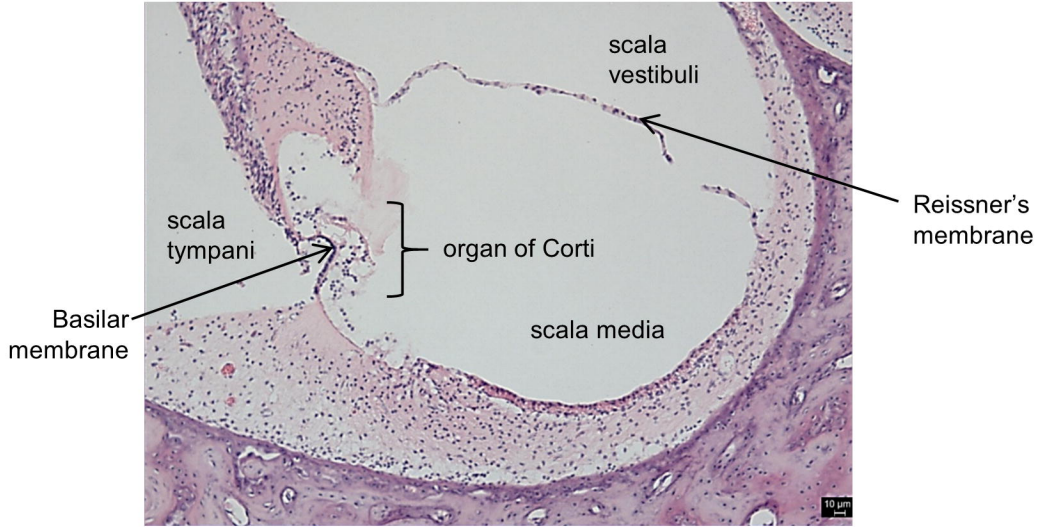

**C**

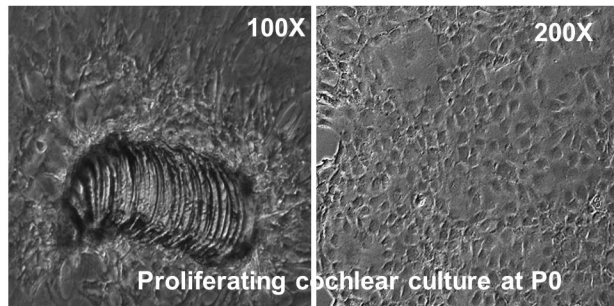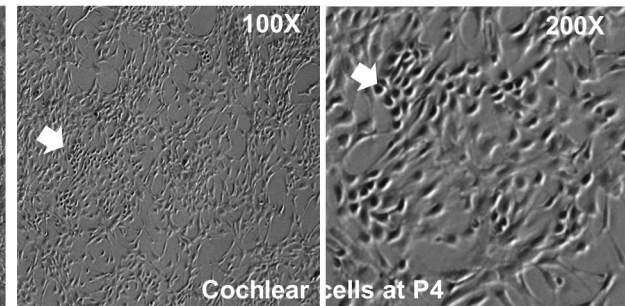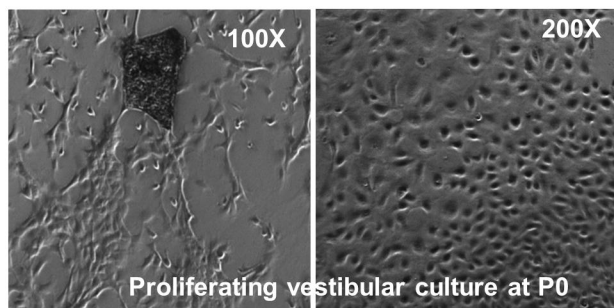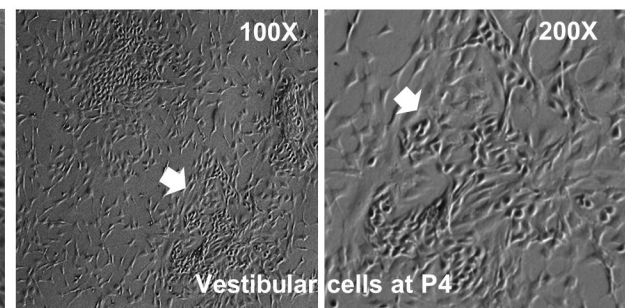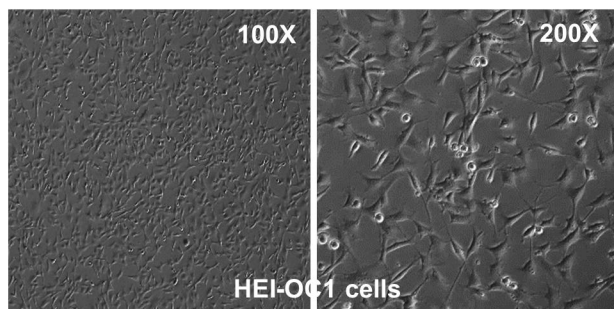

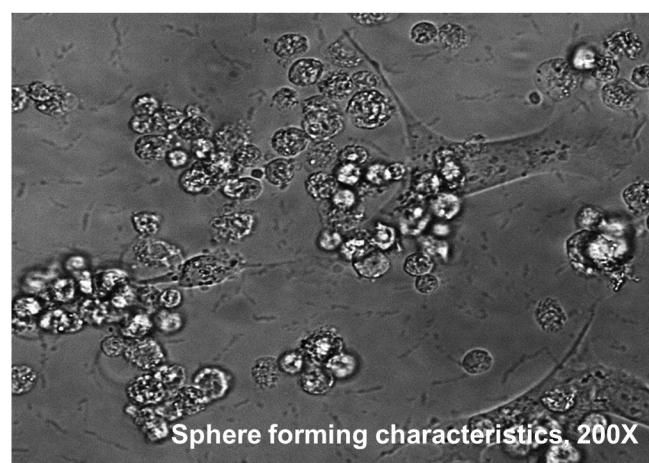

**A**

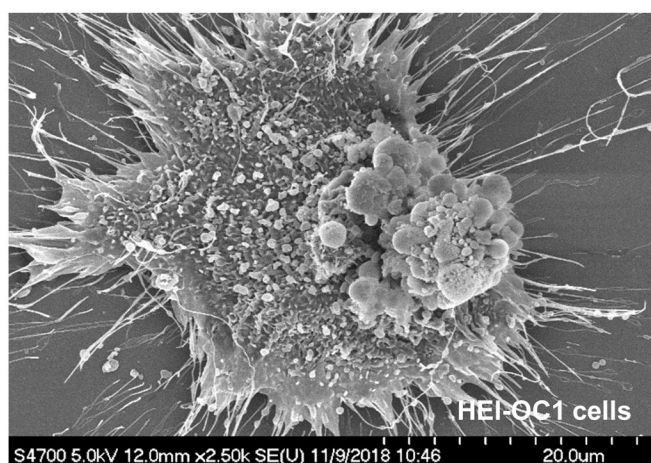

**B**

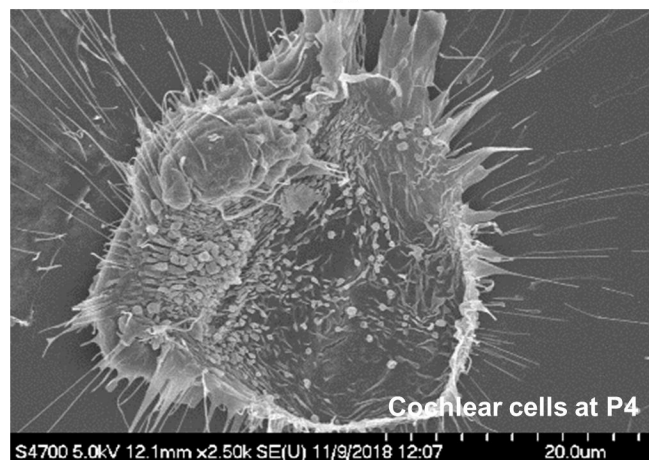

**C**

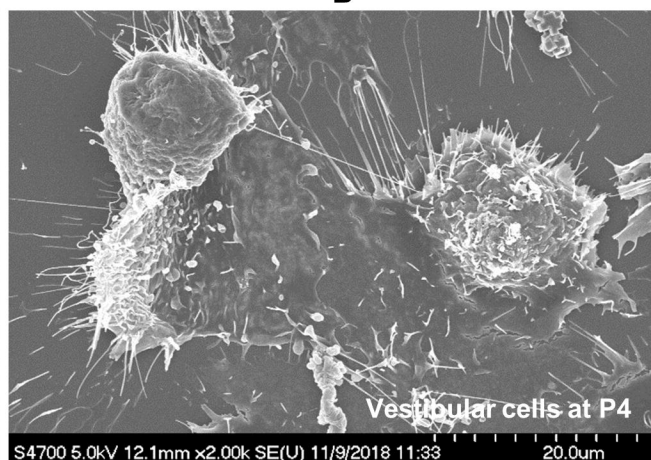

**D**



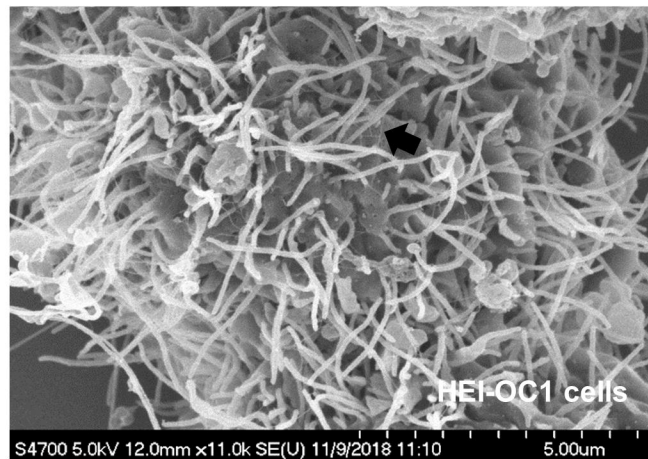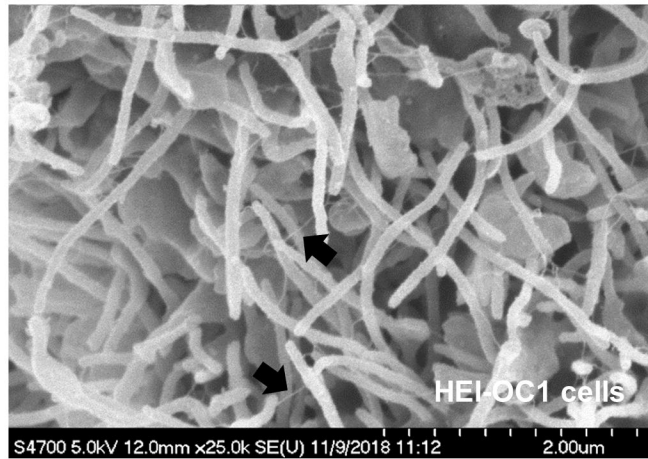

A

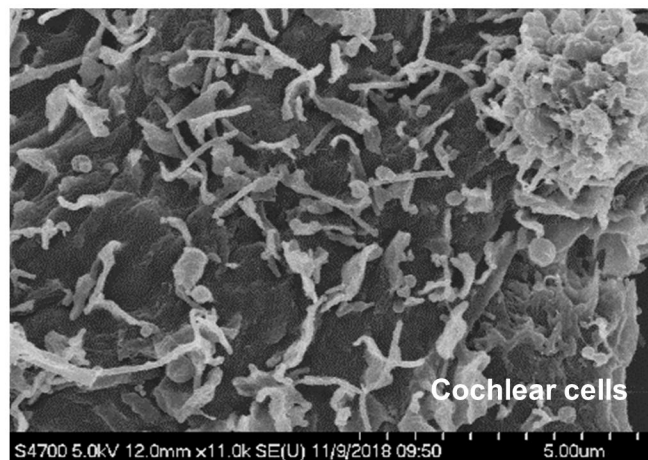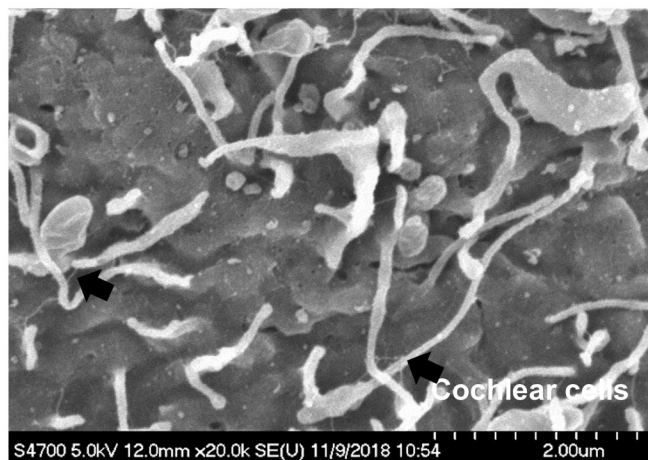

B

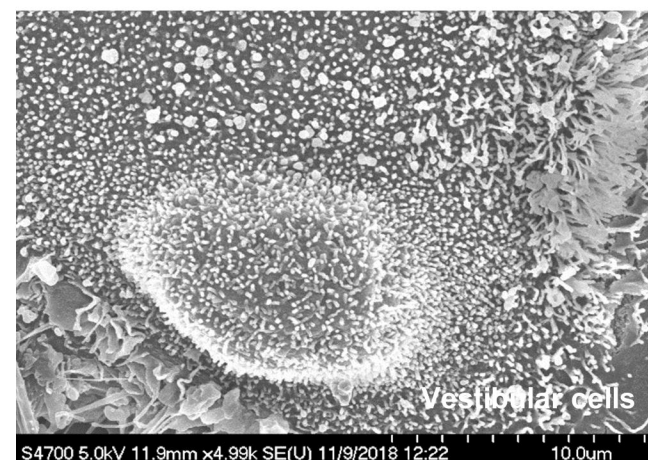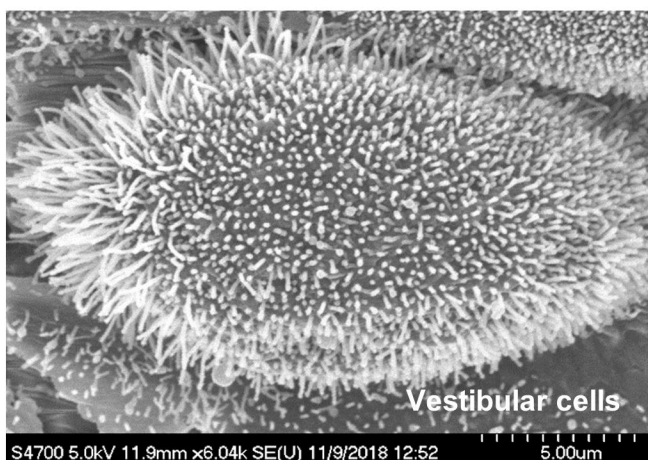

C

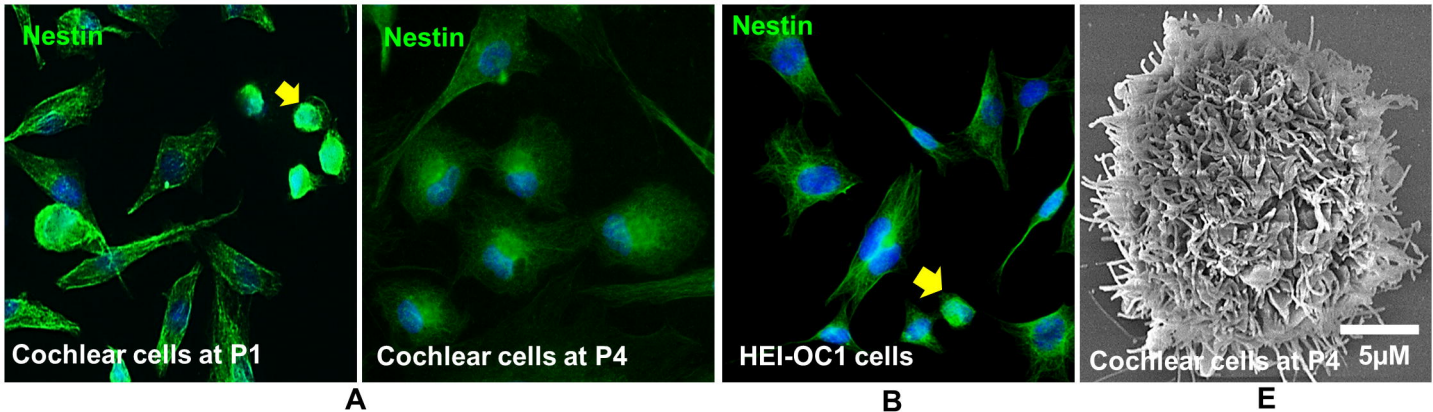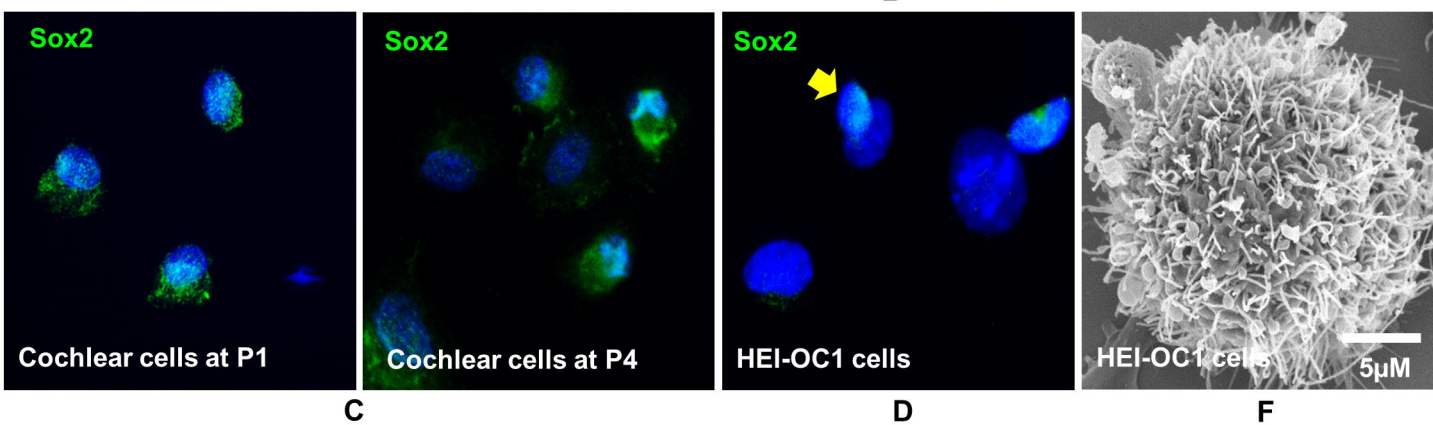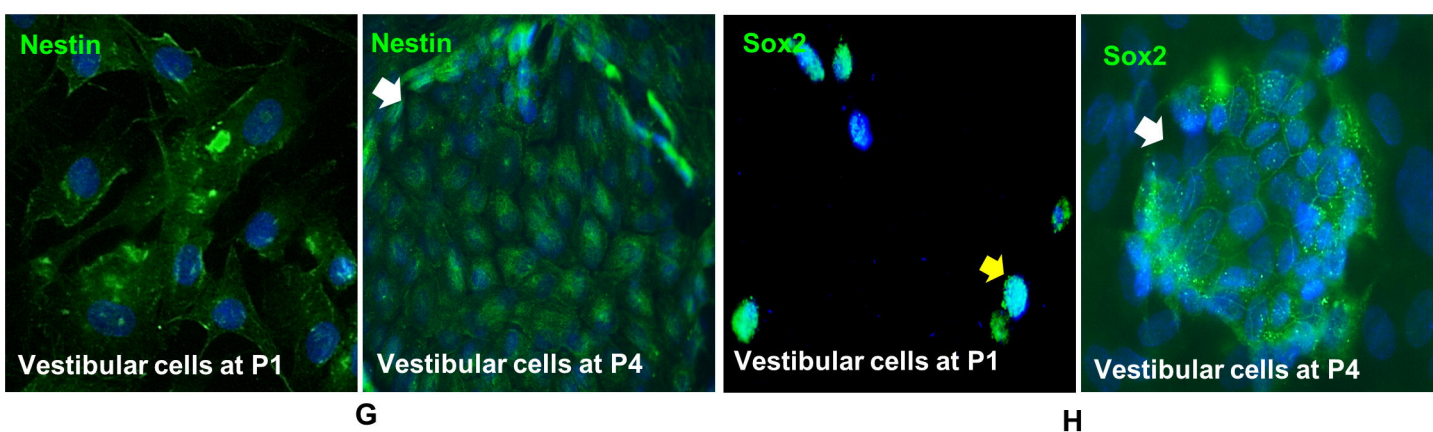

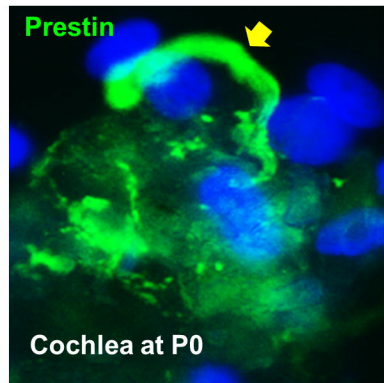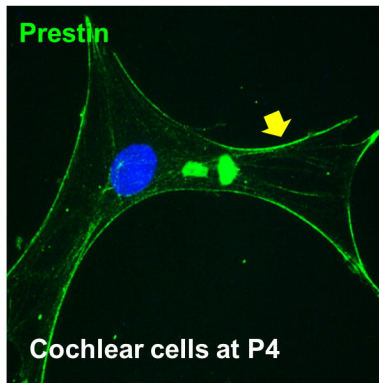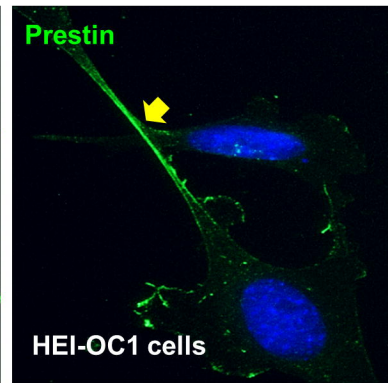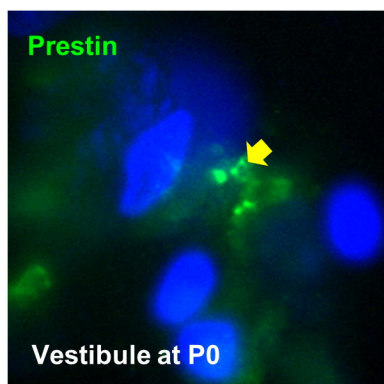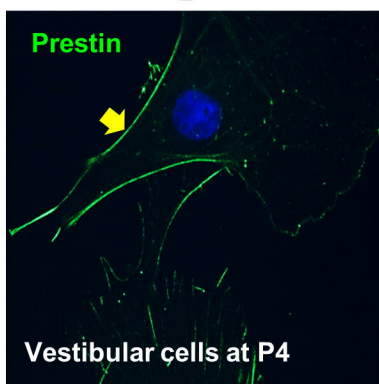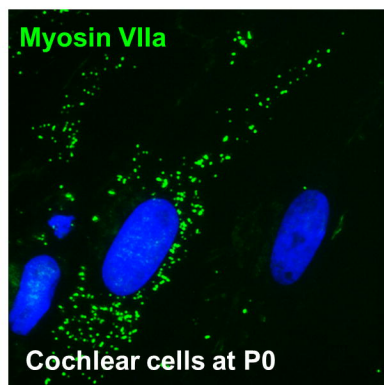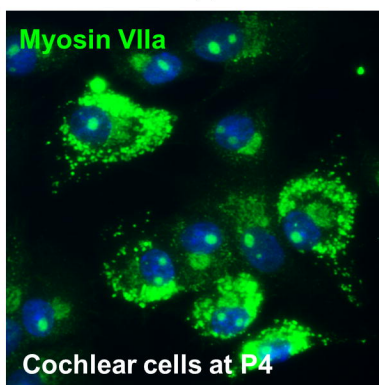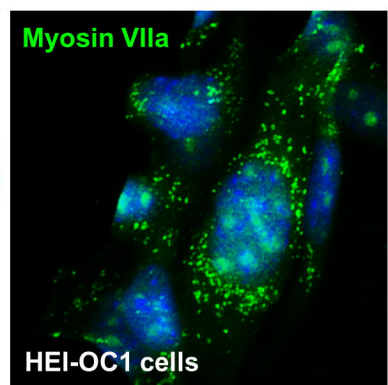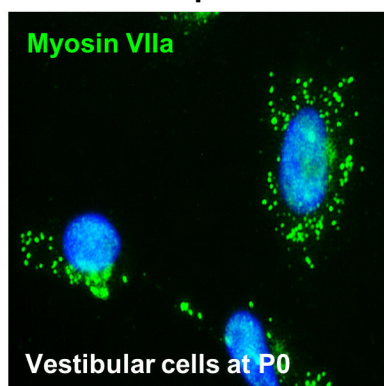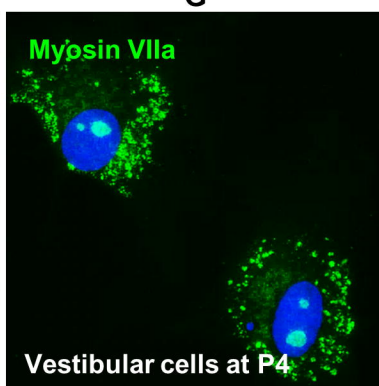

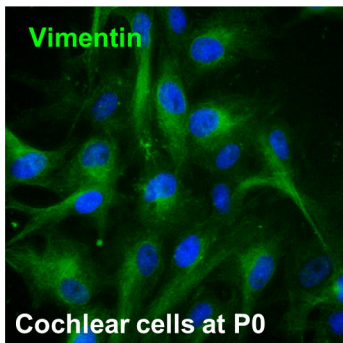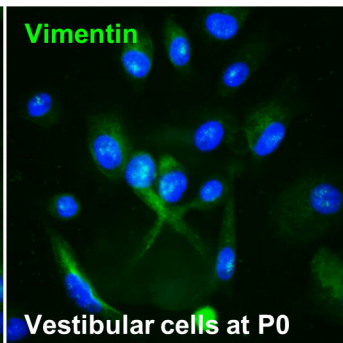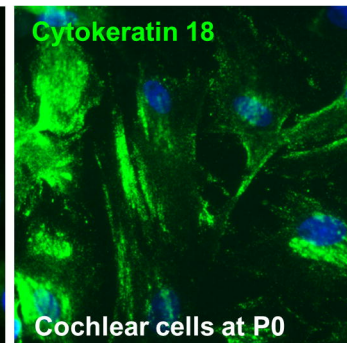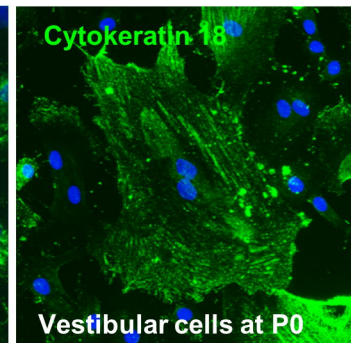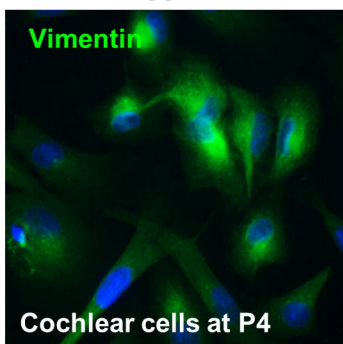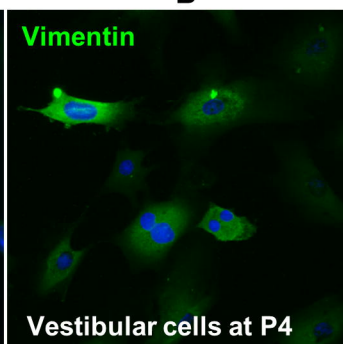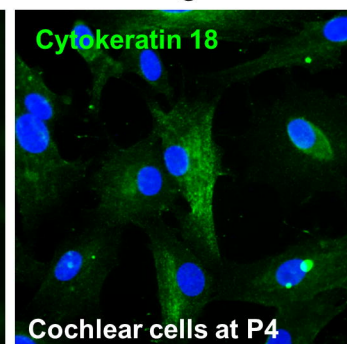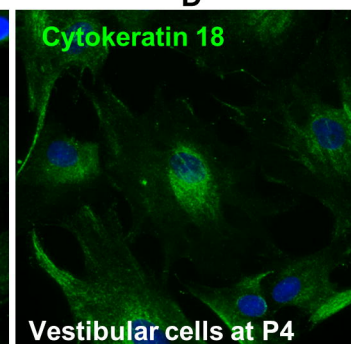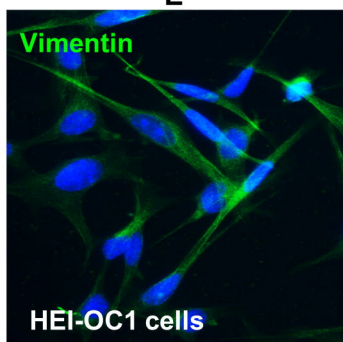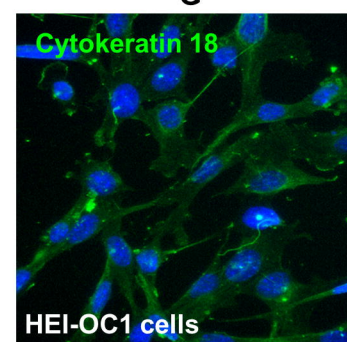

Vestibular cells at P4

Cochlear cells at P4

HEI-OC1 cells

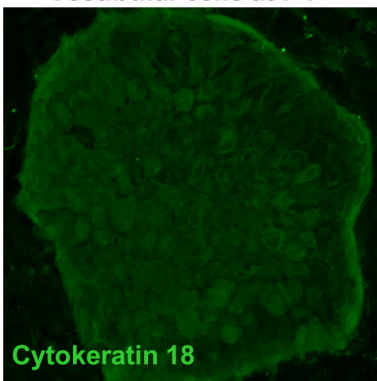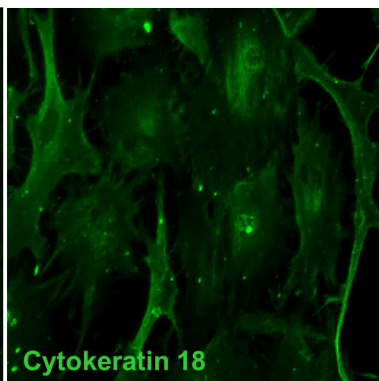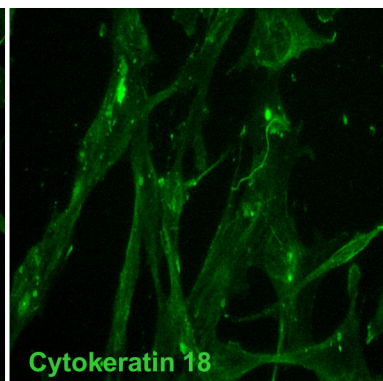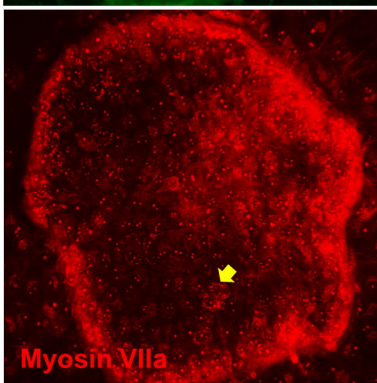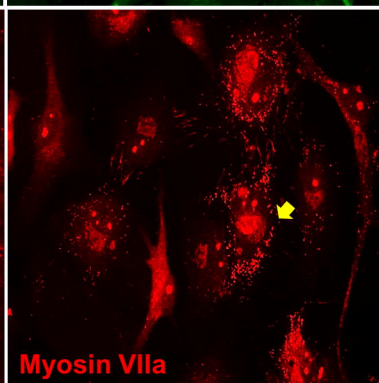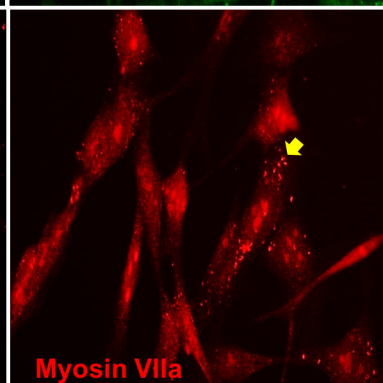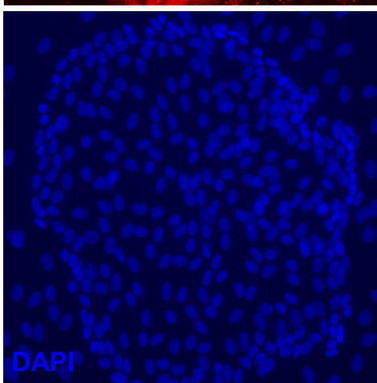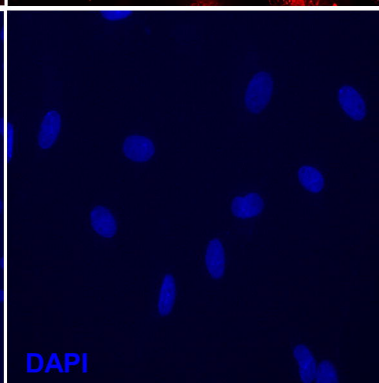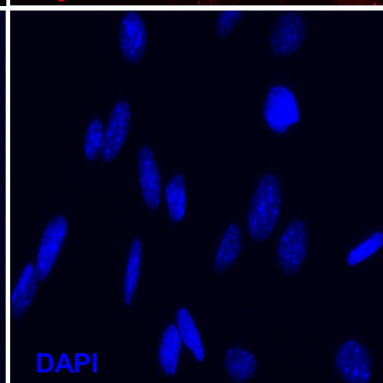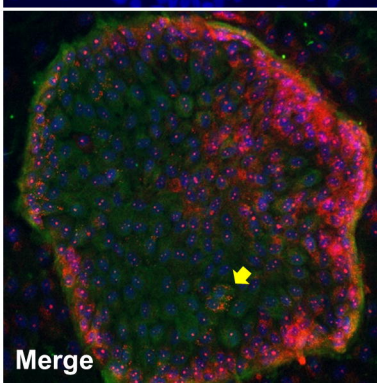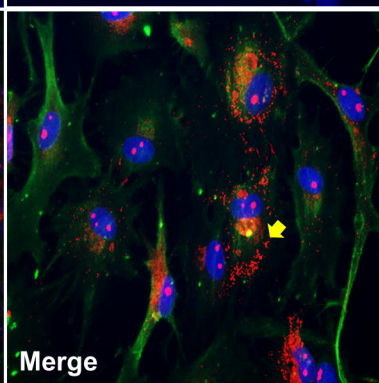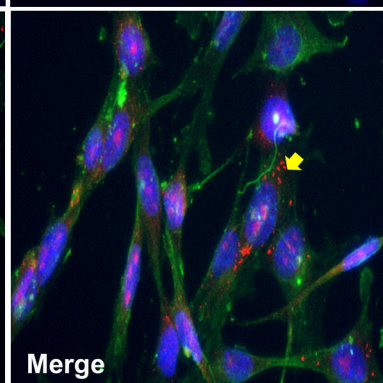

A

B

C

### A) Adult porcine inner ear tissues

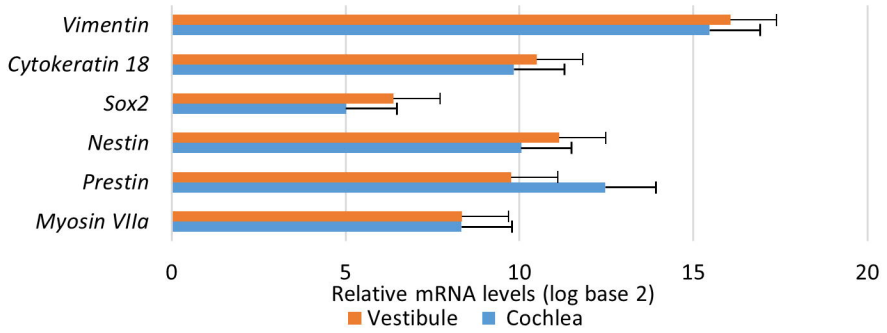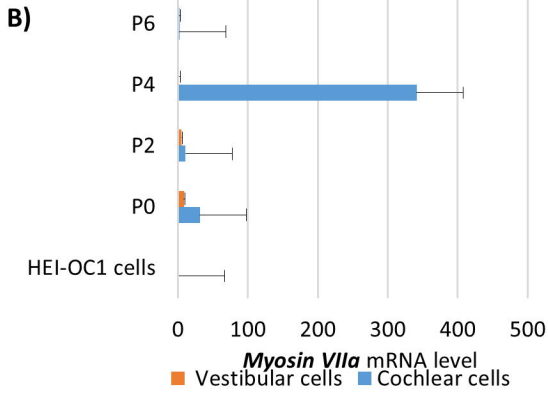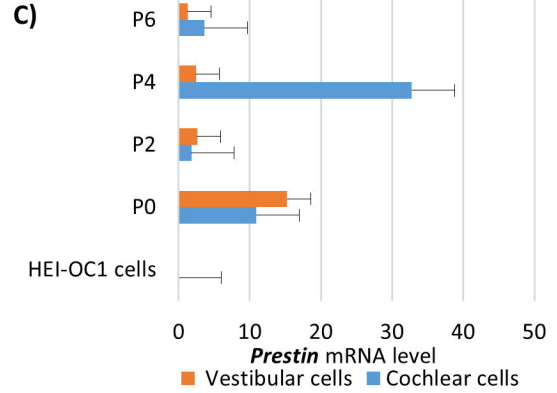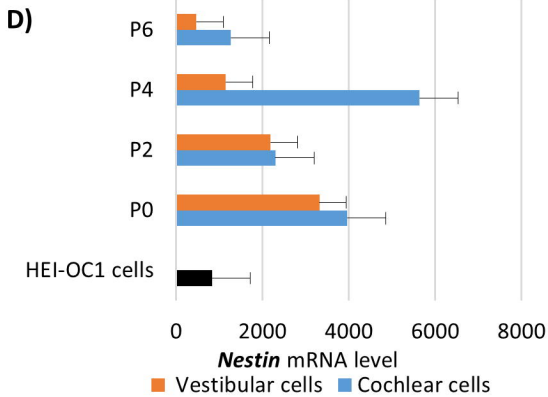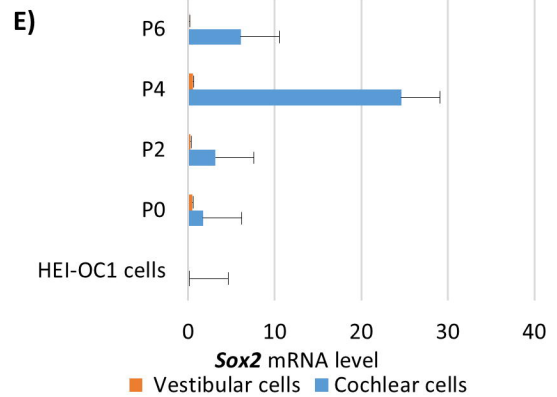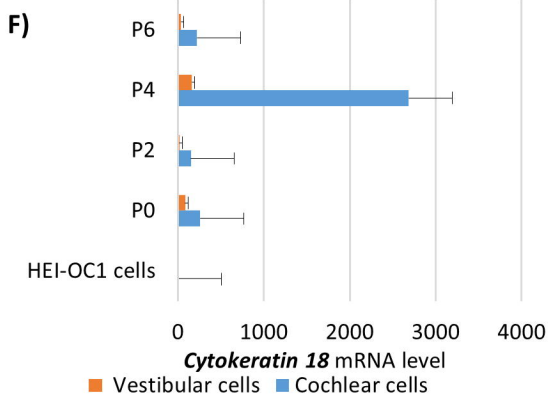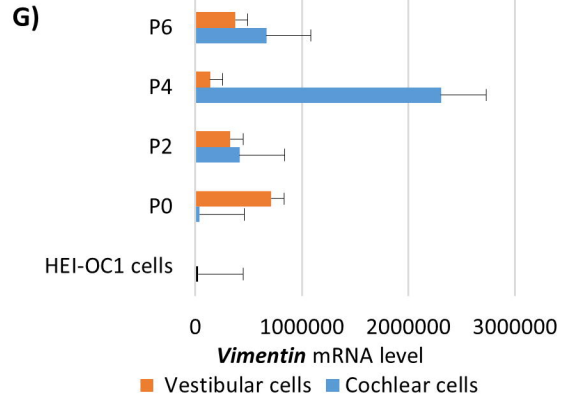

Source: http://biorxiv.org/content/10.1101/2021.01.22.427339v1.full.pdf
